# Supplementary material for: Prognostic value of extracellular matrix gene mutations and expression in multiple myeloma
Source: PubMed Central journal article supplement (PMC10036560; doi:10.1038/s41408-023-00817-7), 2023-03-23

**Figure S1:** Visual representation of protein domains and structure of all ECM molecules. Information on protein domains was obtained from the UniProt knowledgebase (<https://www.uniprot.org/>). Locations of patient mutations found in the MMRF (black) and our dataset (orange) are marked with stars. Mutations within the same protein detected in the same patient are marked with grey stars. Images were created using PowerPoint.

Integrins

# Integrin $\alpha$ subunits

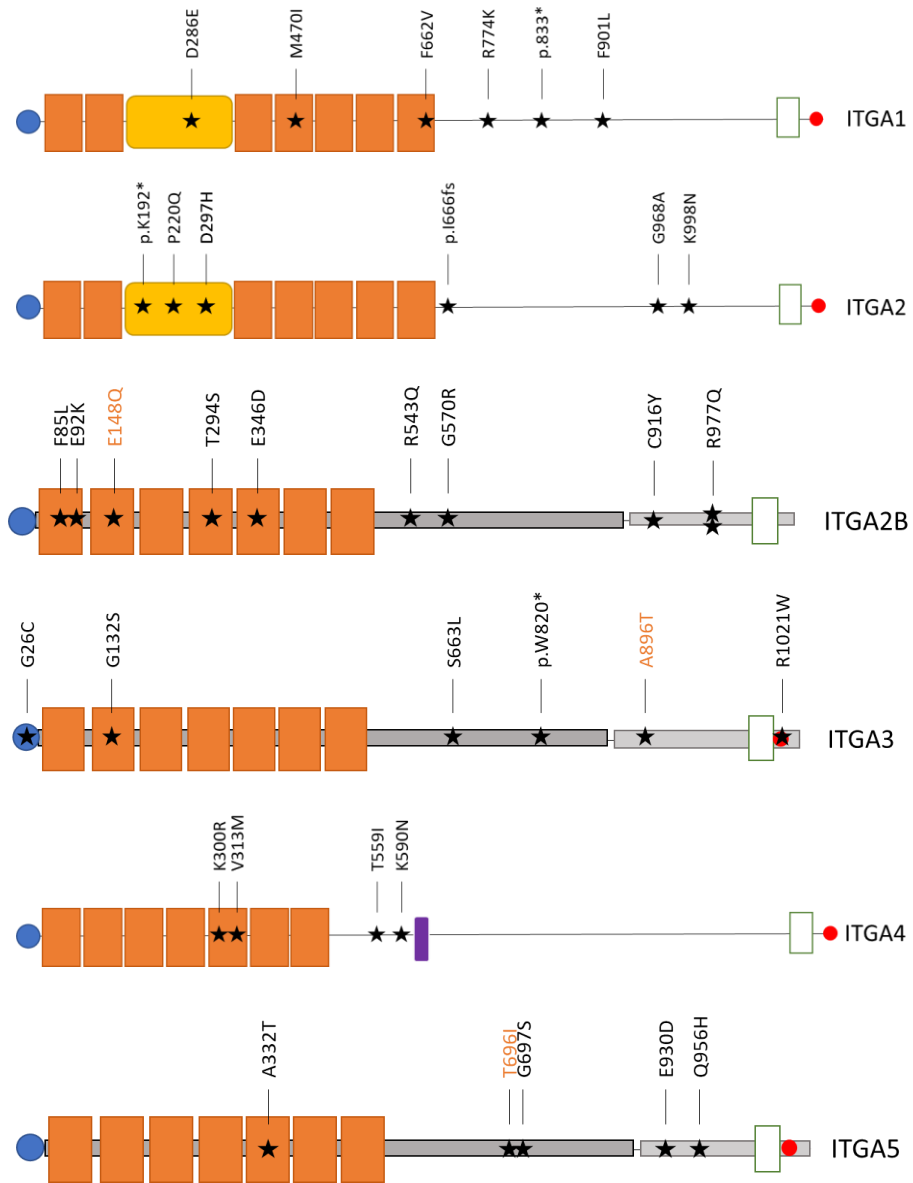

● Signal peptide  
  FG-GAP  
  VWFA  
  Helical transmembrane  
 ● GFFKR motif  
  Heavy chain  
  Light chain  
  SG1  
  X domain  
  Cell attachment site  
  Fibronectin type III domain  
  PSI

# Integrin $\alpha$ subunits

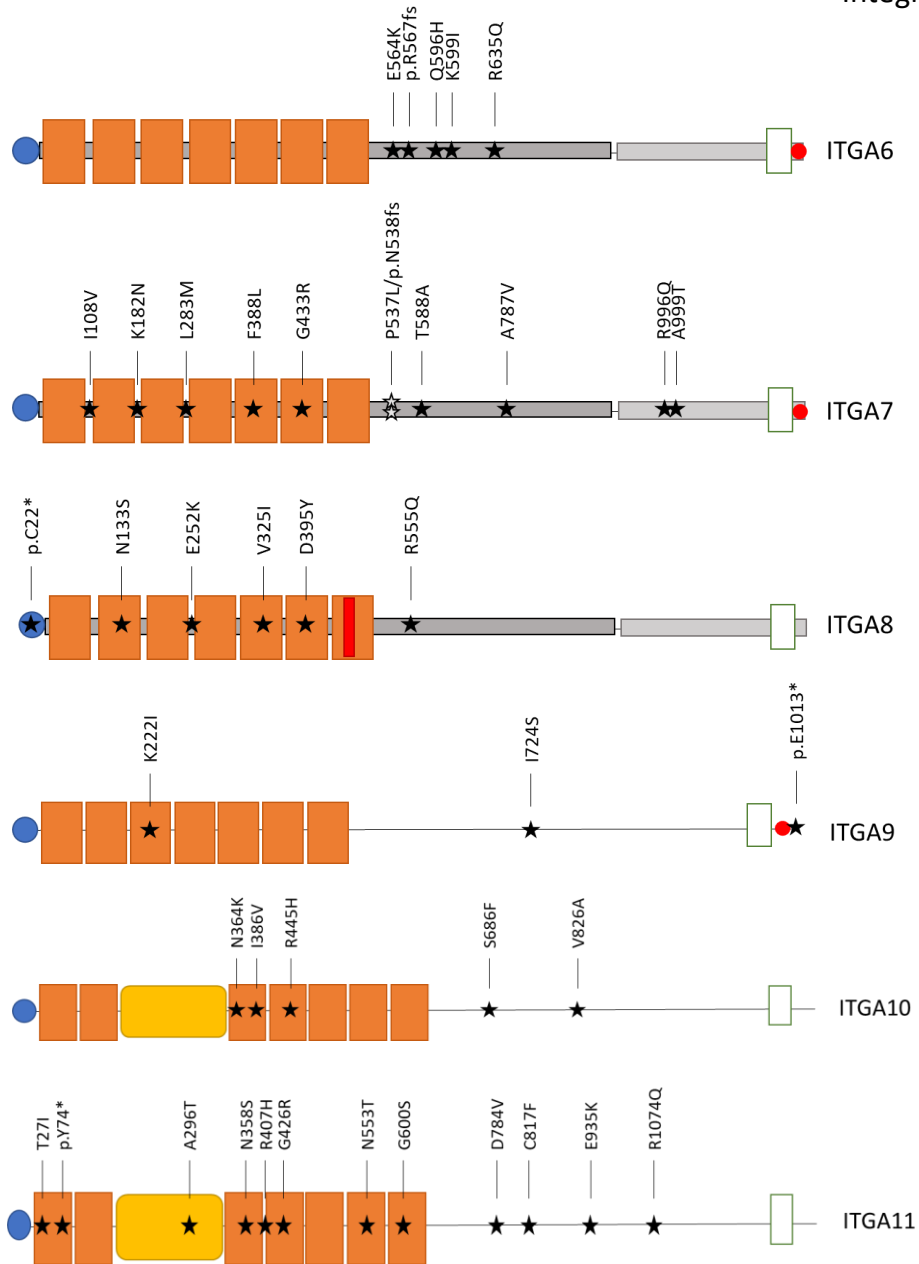

● Signal peptide 
  FG-GAP 
  VWFA 
  Helical transmembrane 
 ● GFFKR motif 
  Heavy chain 
  Light chain 
  SG1 
  X domain 
  Cell attachment site 
  Fibronectin type III domain 
  PSI

# Integrin $\alpha$ subunits

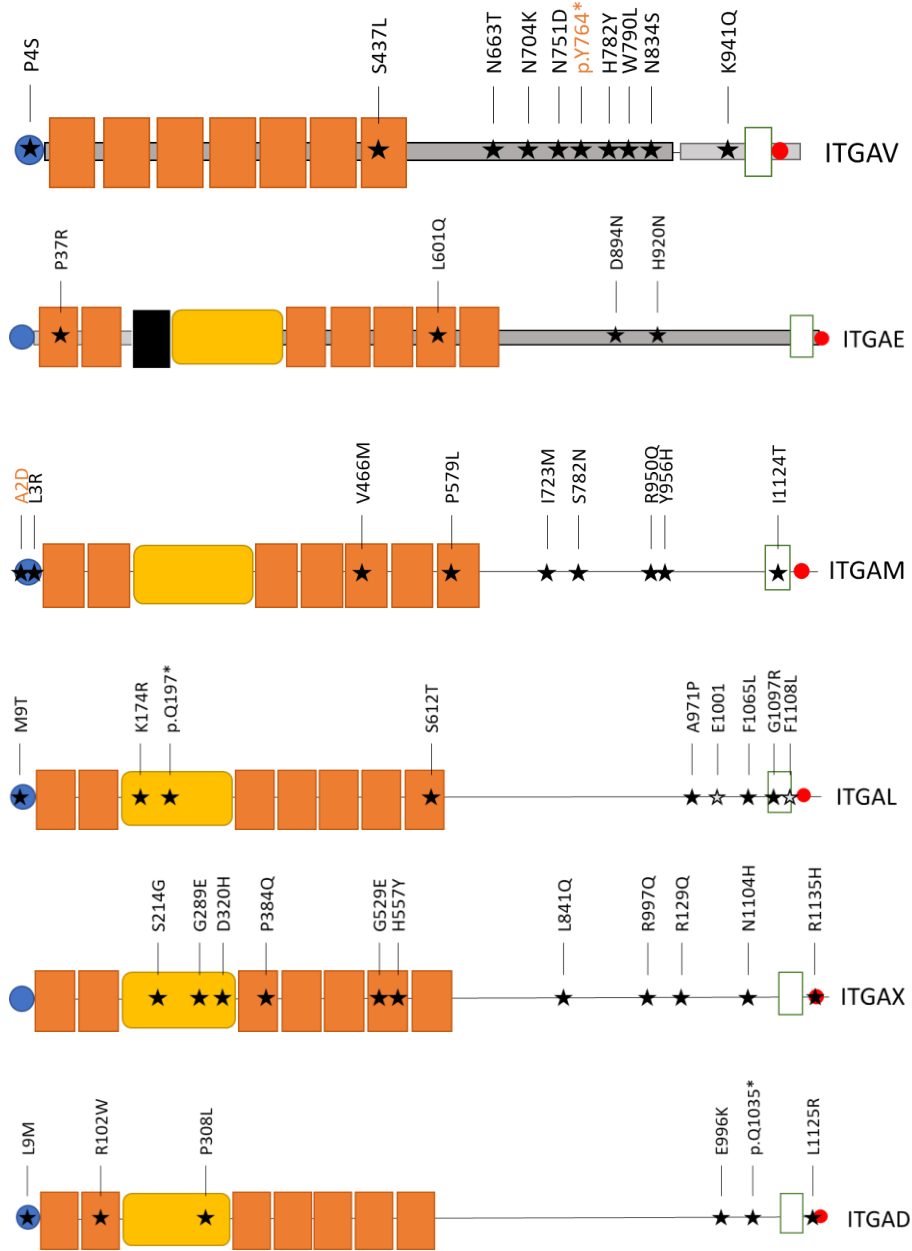

● Signal peptide    ■ FG-GAP    ■ VWFA    □ Helical transmembrane    ● GFFKR motif    ■ Heavy chain    ■ Light chain    ■ SG1    ■ X domain    ■ Cell attachment site    ■ Fibronectin type III domain    ■ PSI

# Integrin $\beta$ subunits

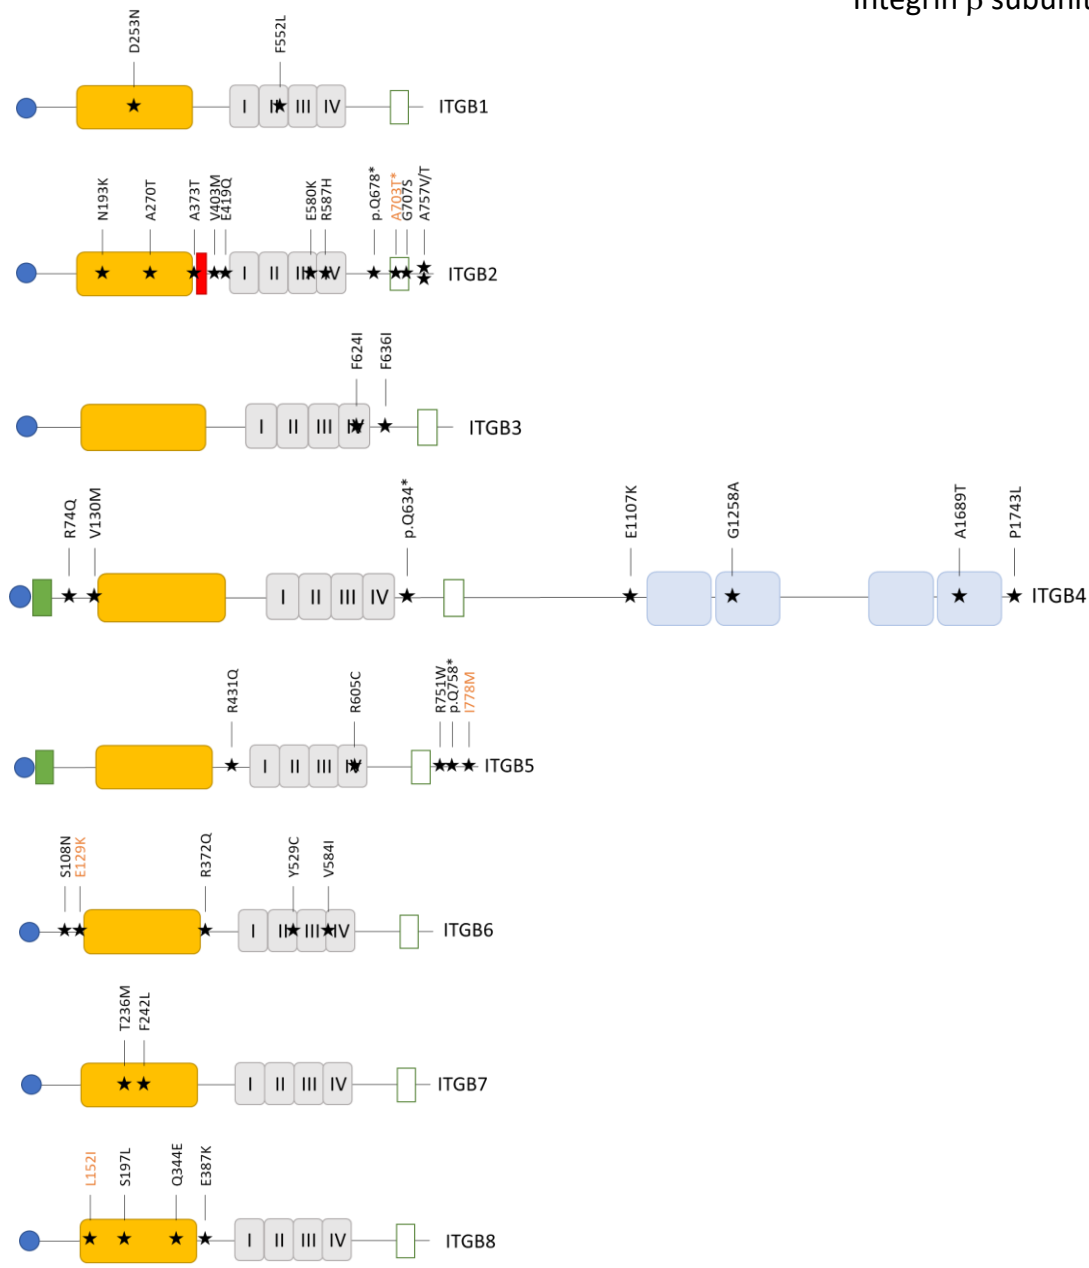

● Signal peptide 
 ■ FG-GAP 
  VWFA 
  Helical transmembrane 
 ● GFFKR motif 
  Heavy chain 
  Light chain 
  SG1 
  X domain 
  Cell attachment site 
  Fibronectin type III domain 
  PSI

Collagens

# Collagens

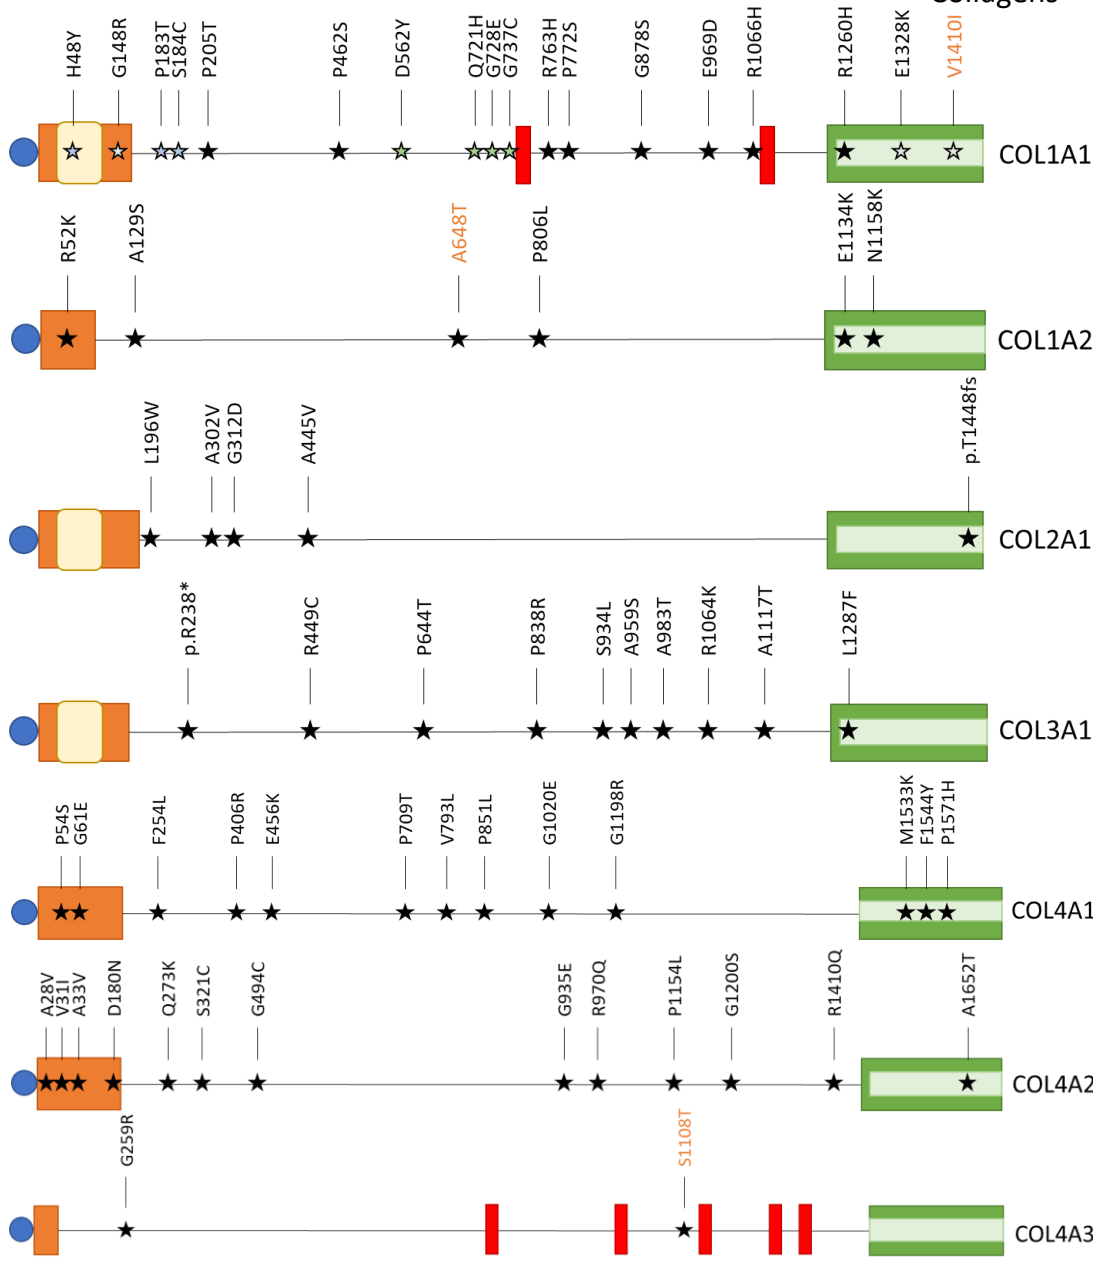

- Signal peptide
- N-terminal Propeptide
- VWFC
- Cell attachment site
- C-terminal Propeptide
- NC1
- Nonhelical region NC2
- VWFA
- Collagen chain
- Fibronectin type III domain
- Laminin G like domain
- Globular domain
- Collagen-like domain
- BPTI domain (Kunitz inhibitor)
- FZ domain



# Collagens

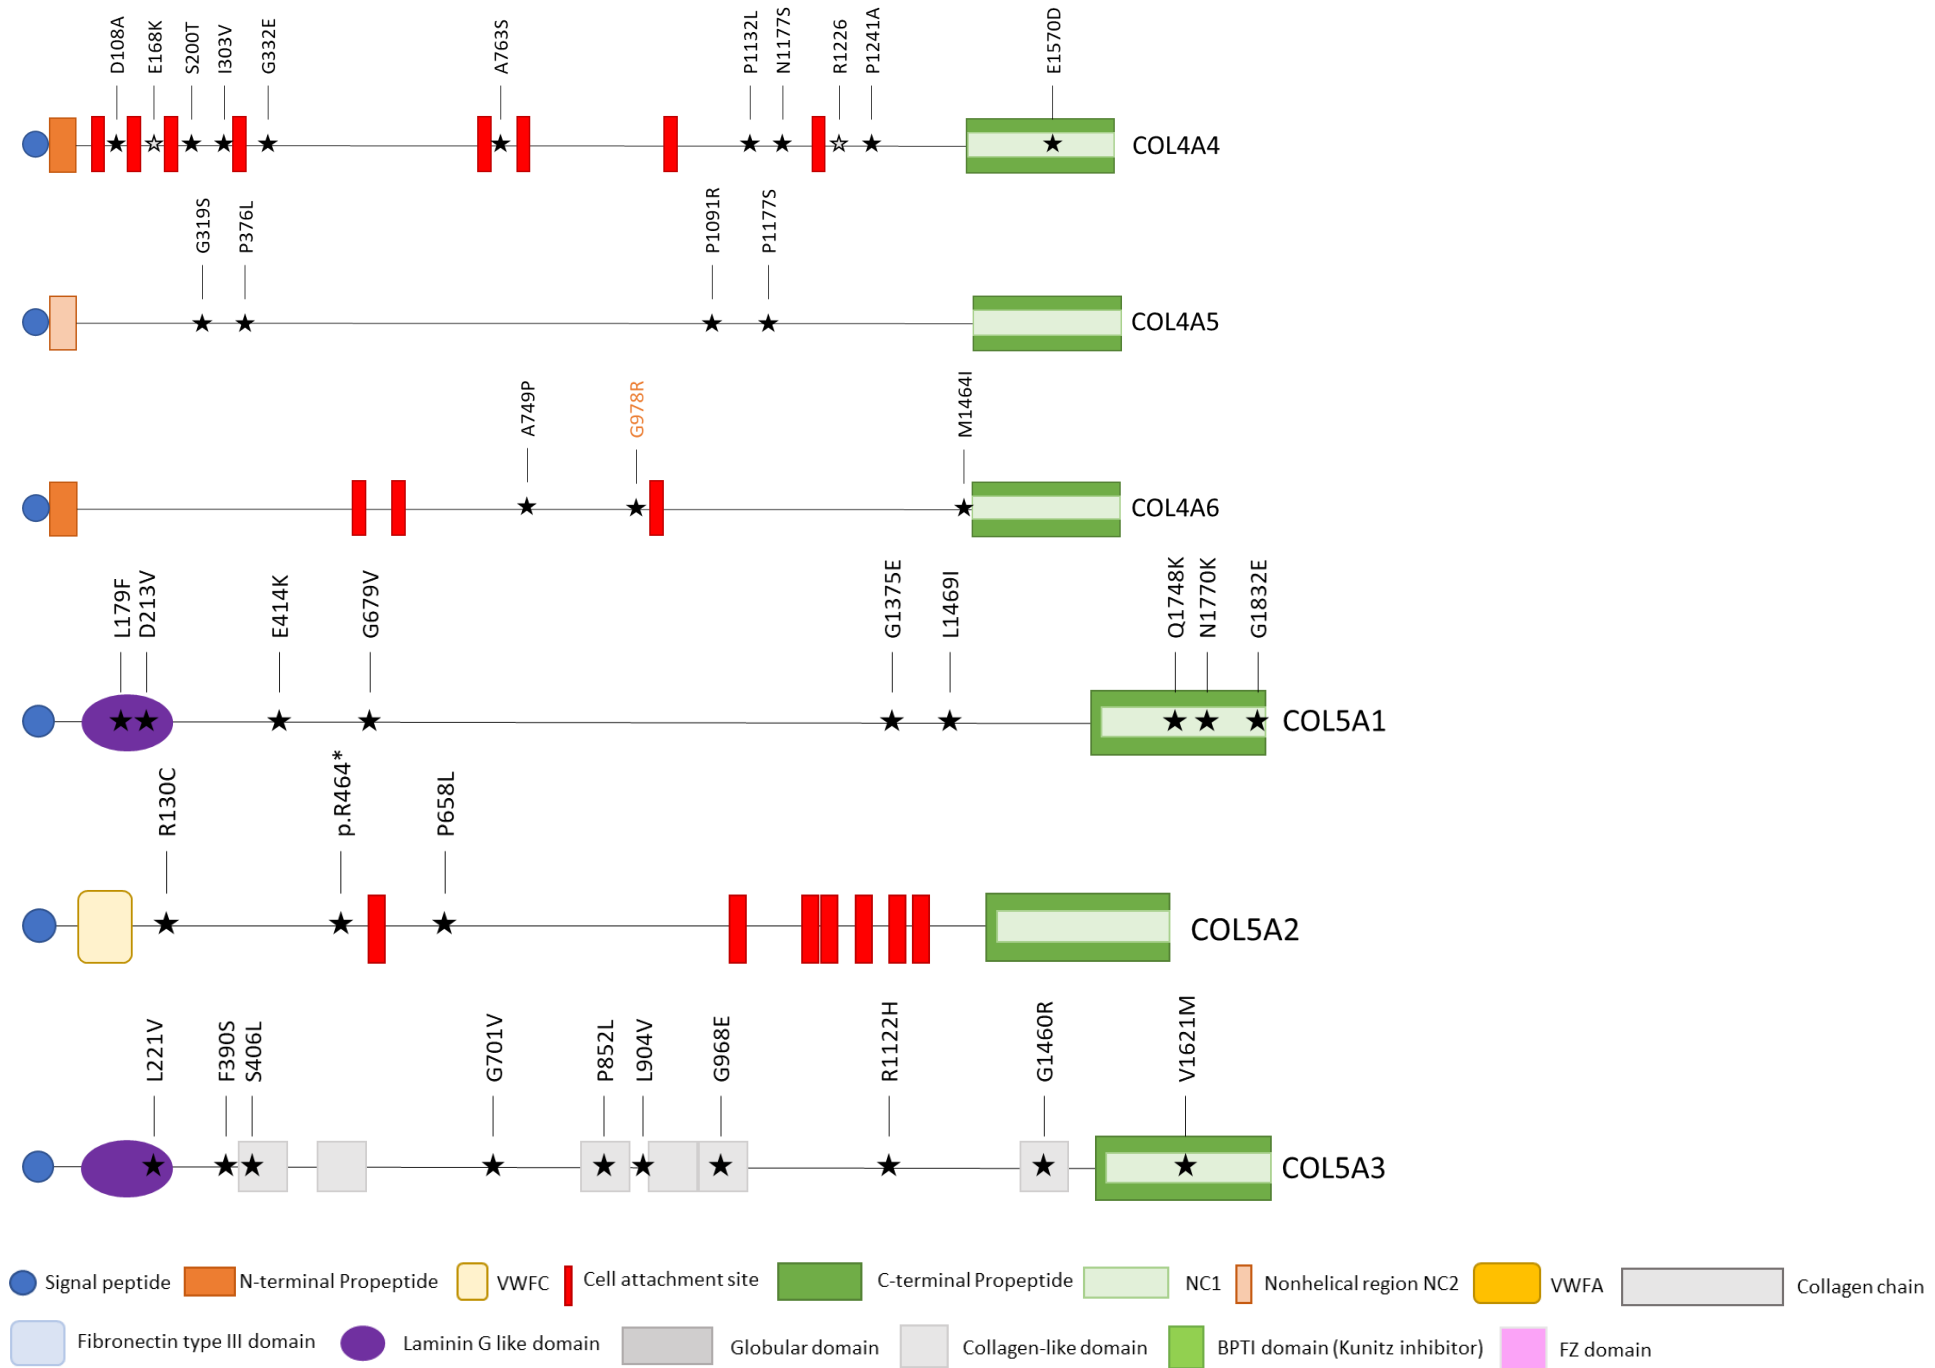

# Collagens

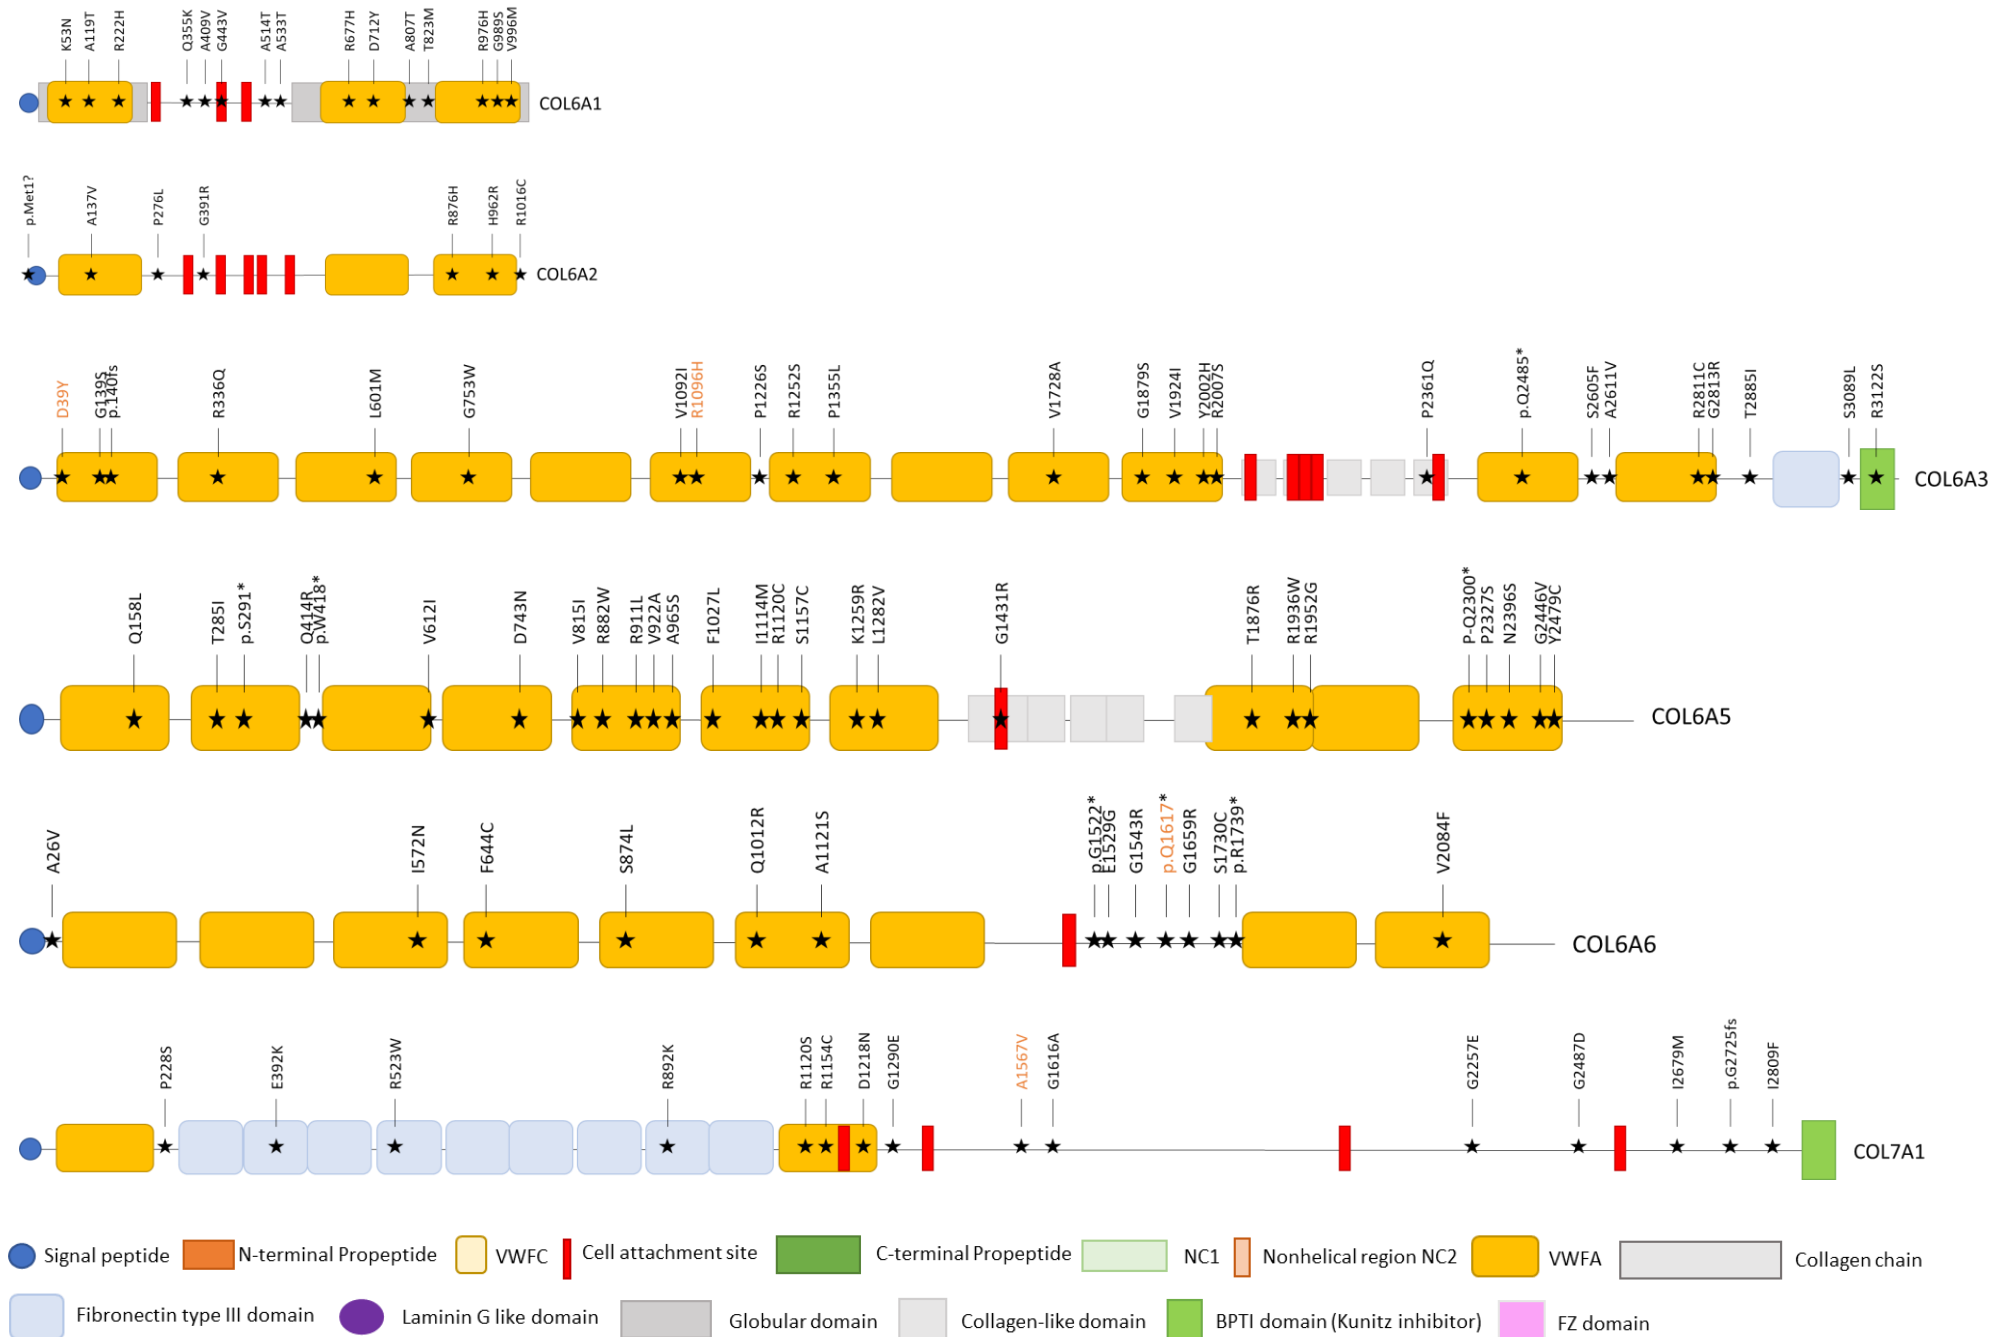

# Collagens

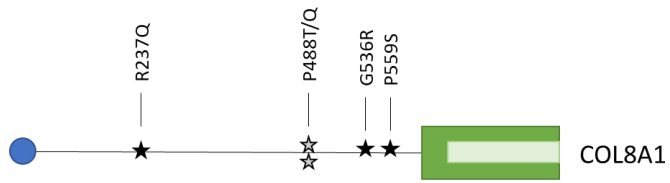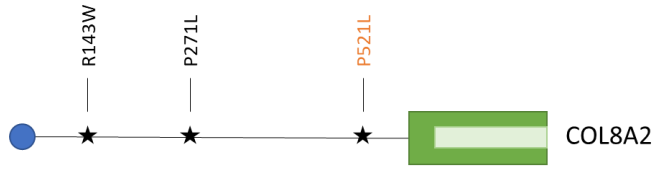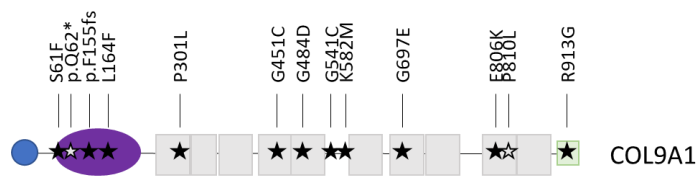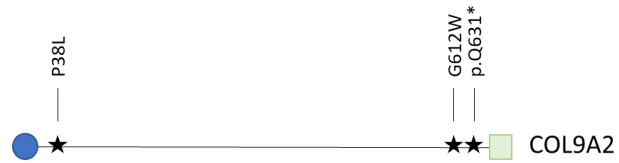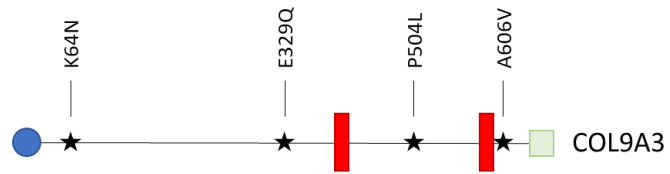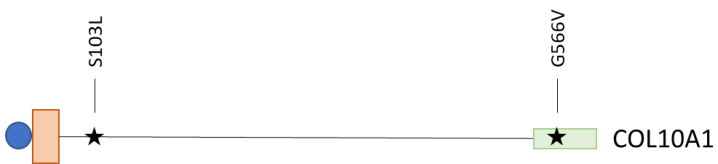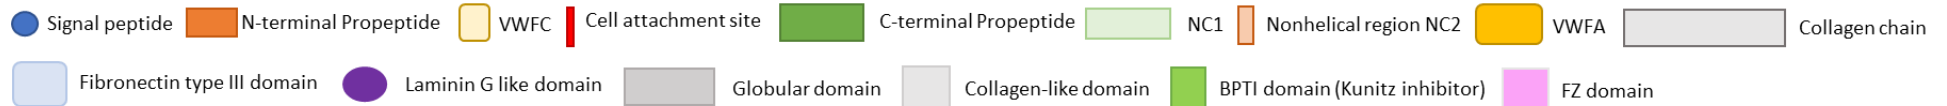

# Collagens

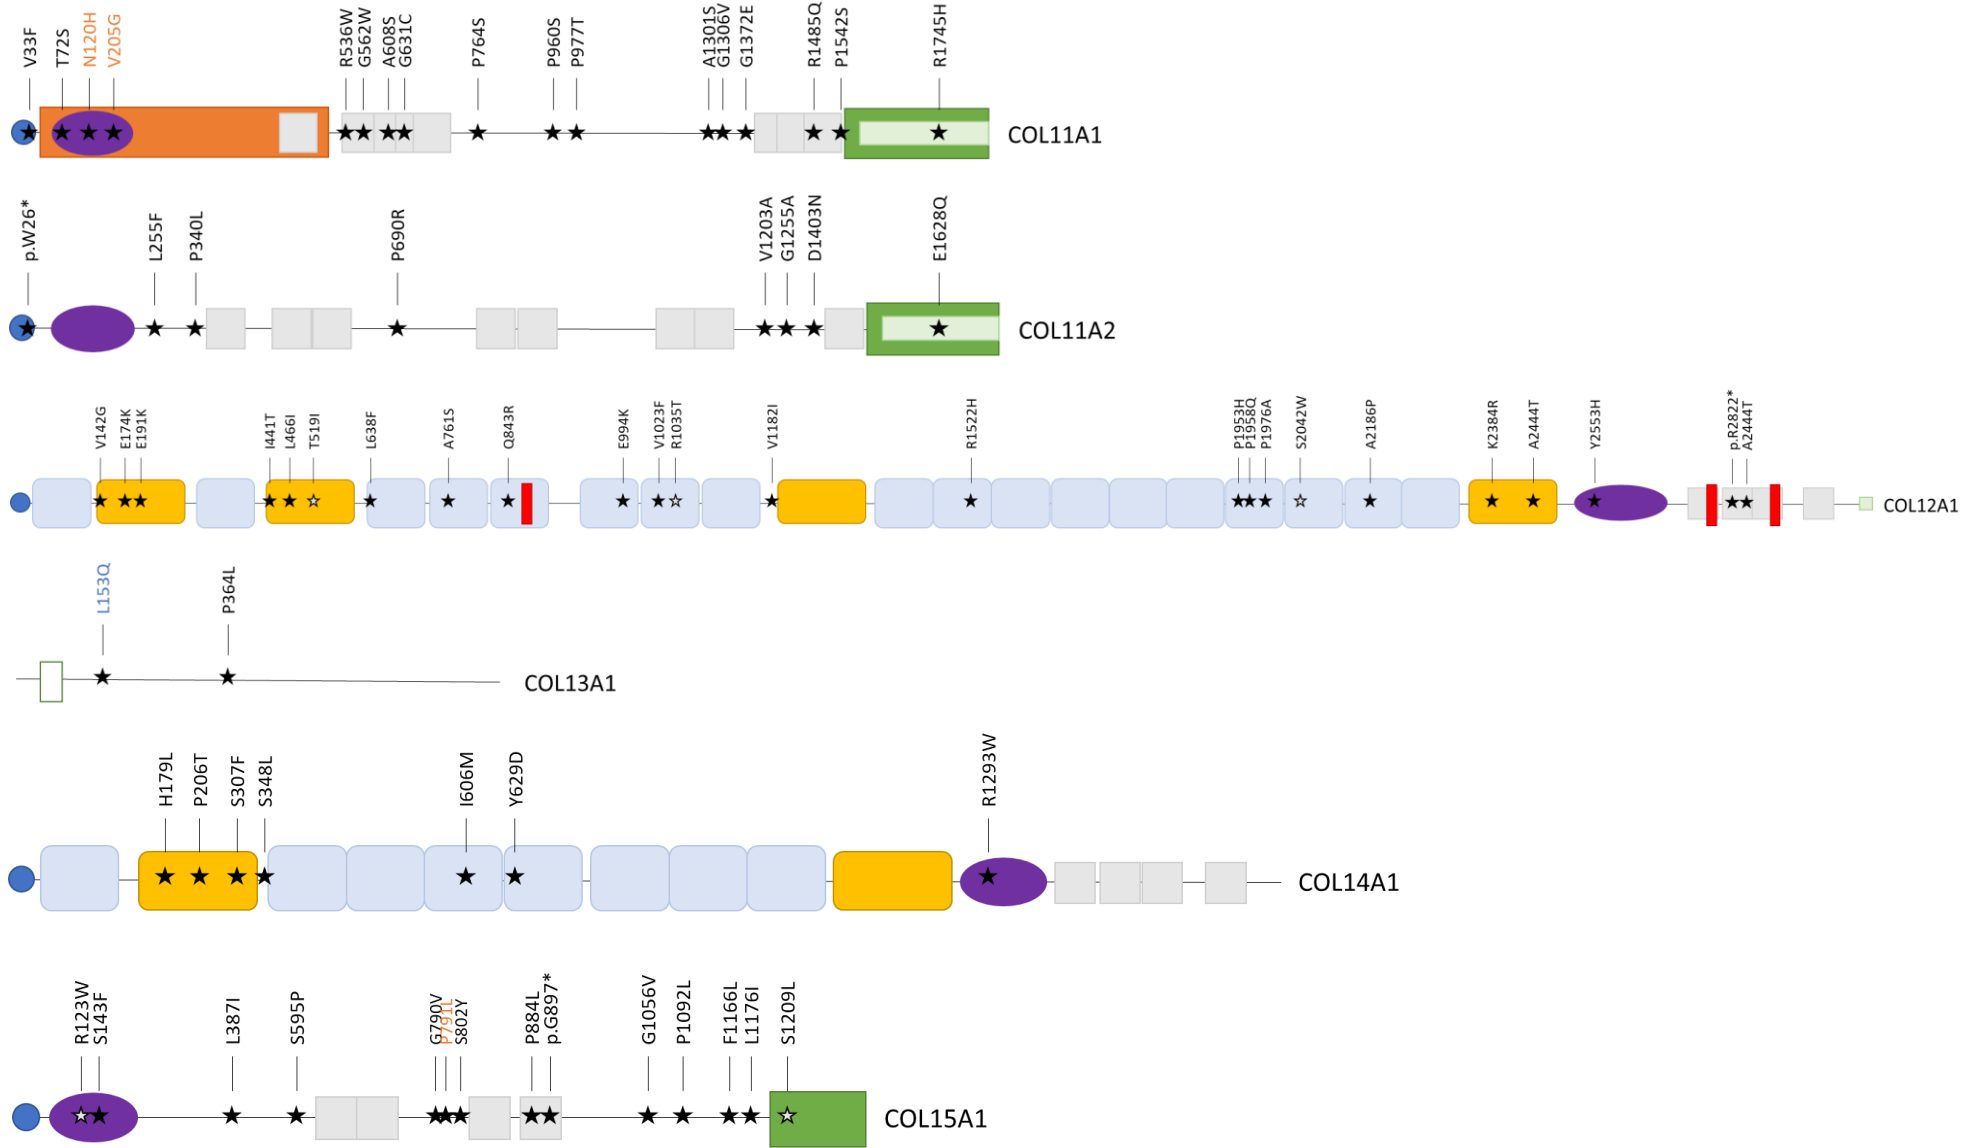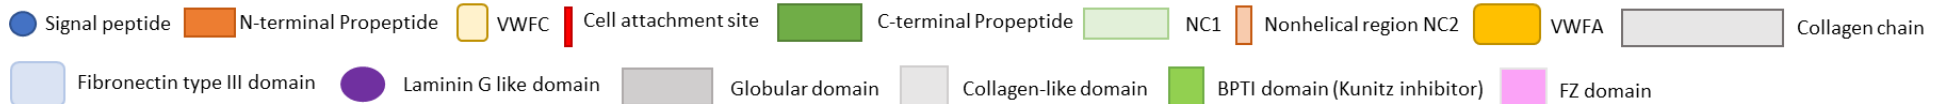

# Collagens

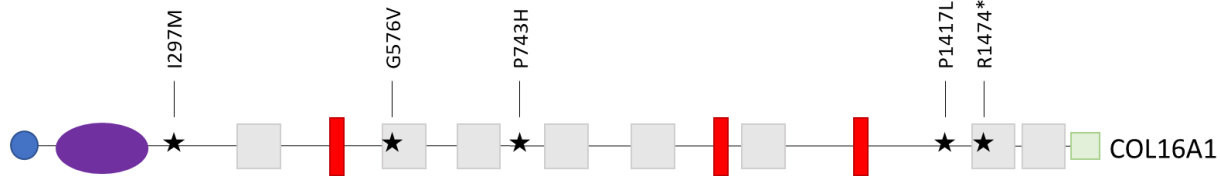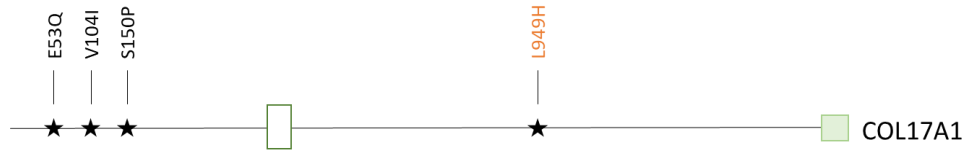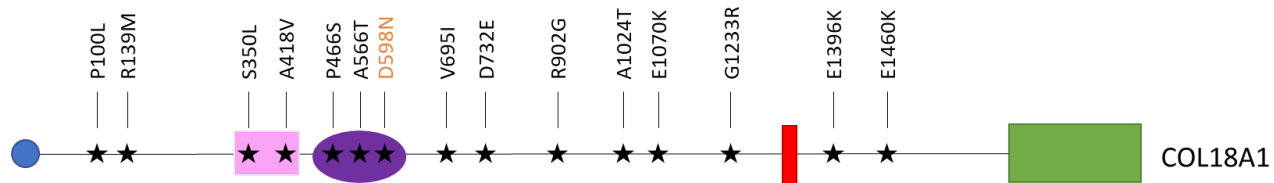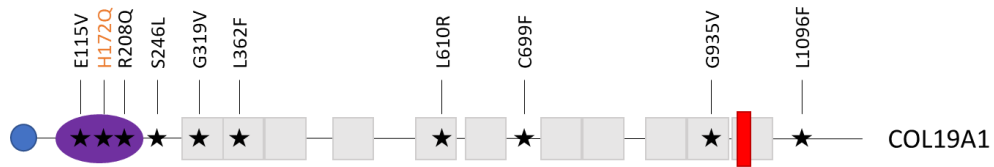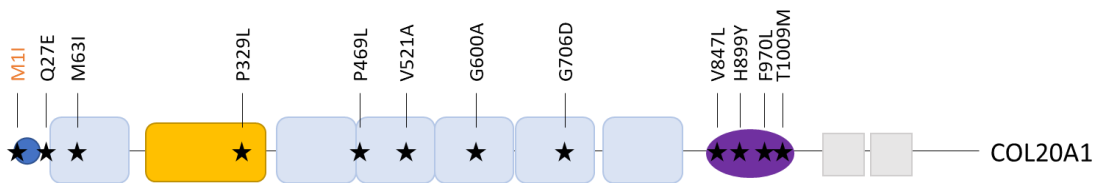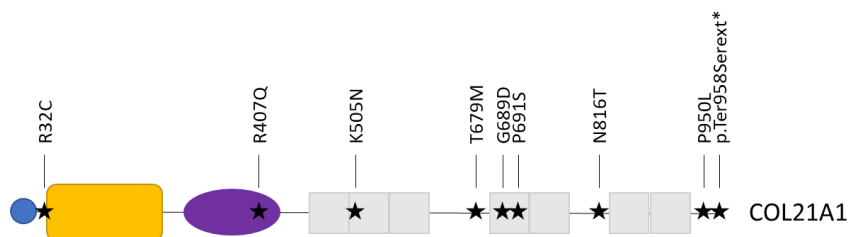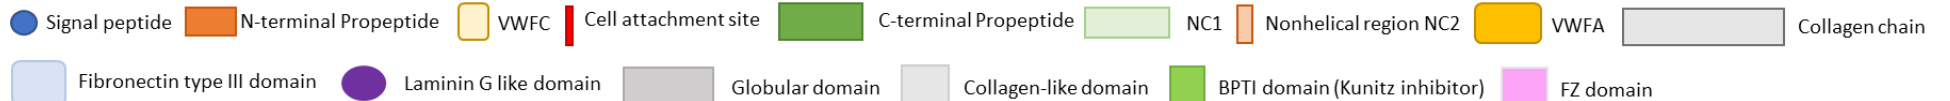

# Collagens

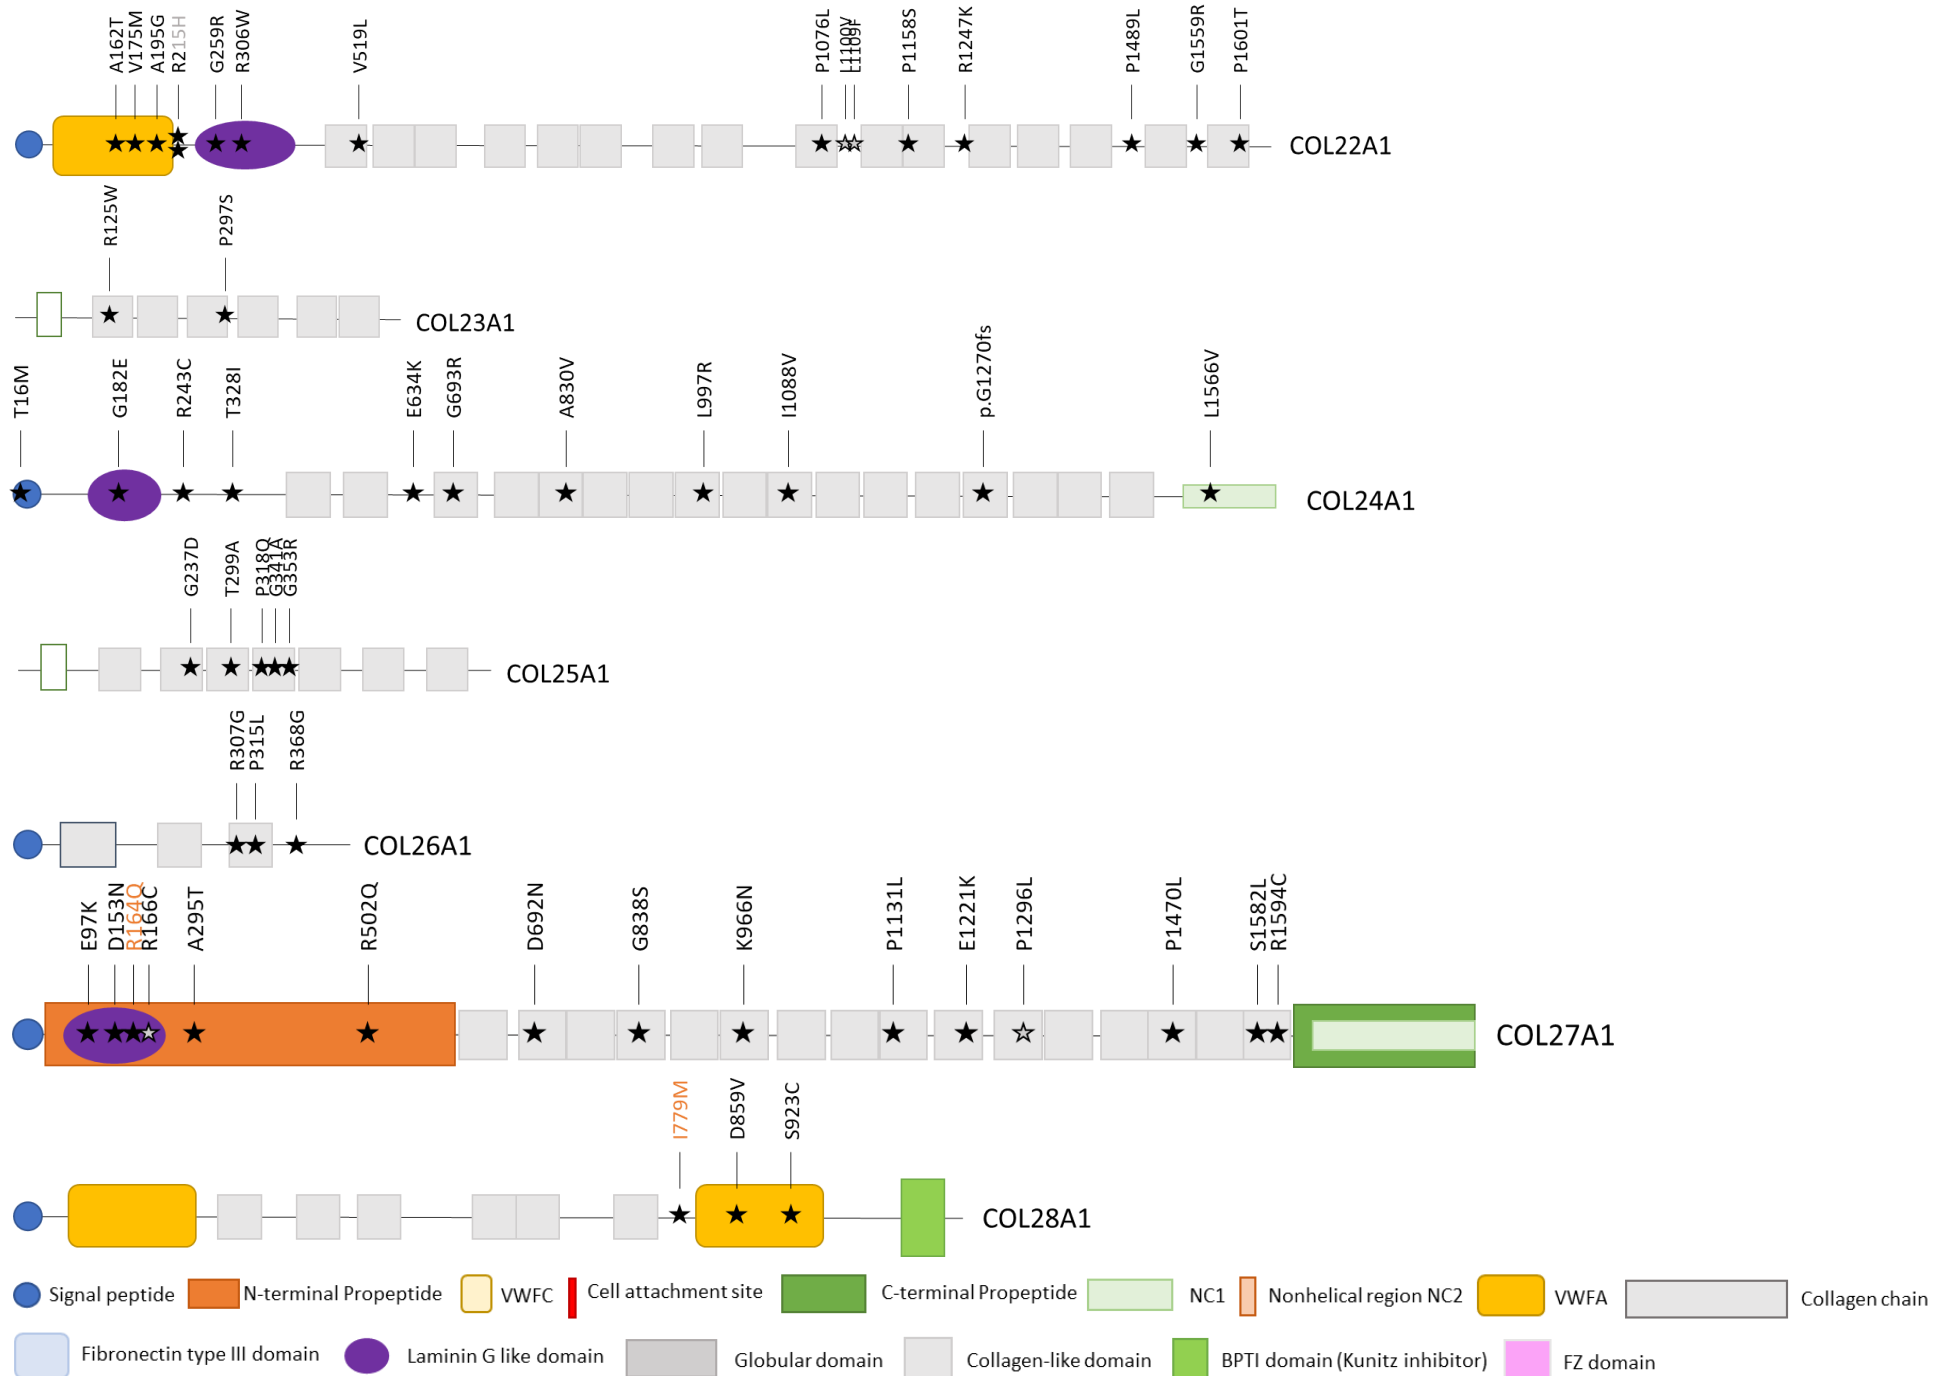

Laminins

# Laminin $\alpha$ subunits

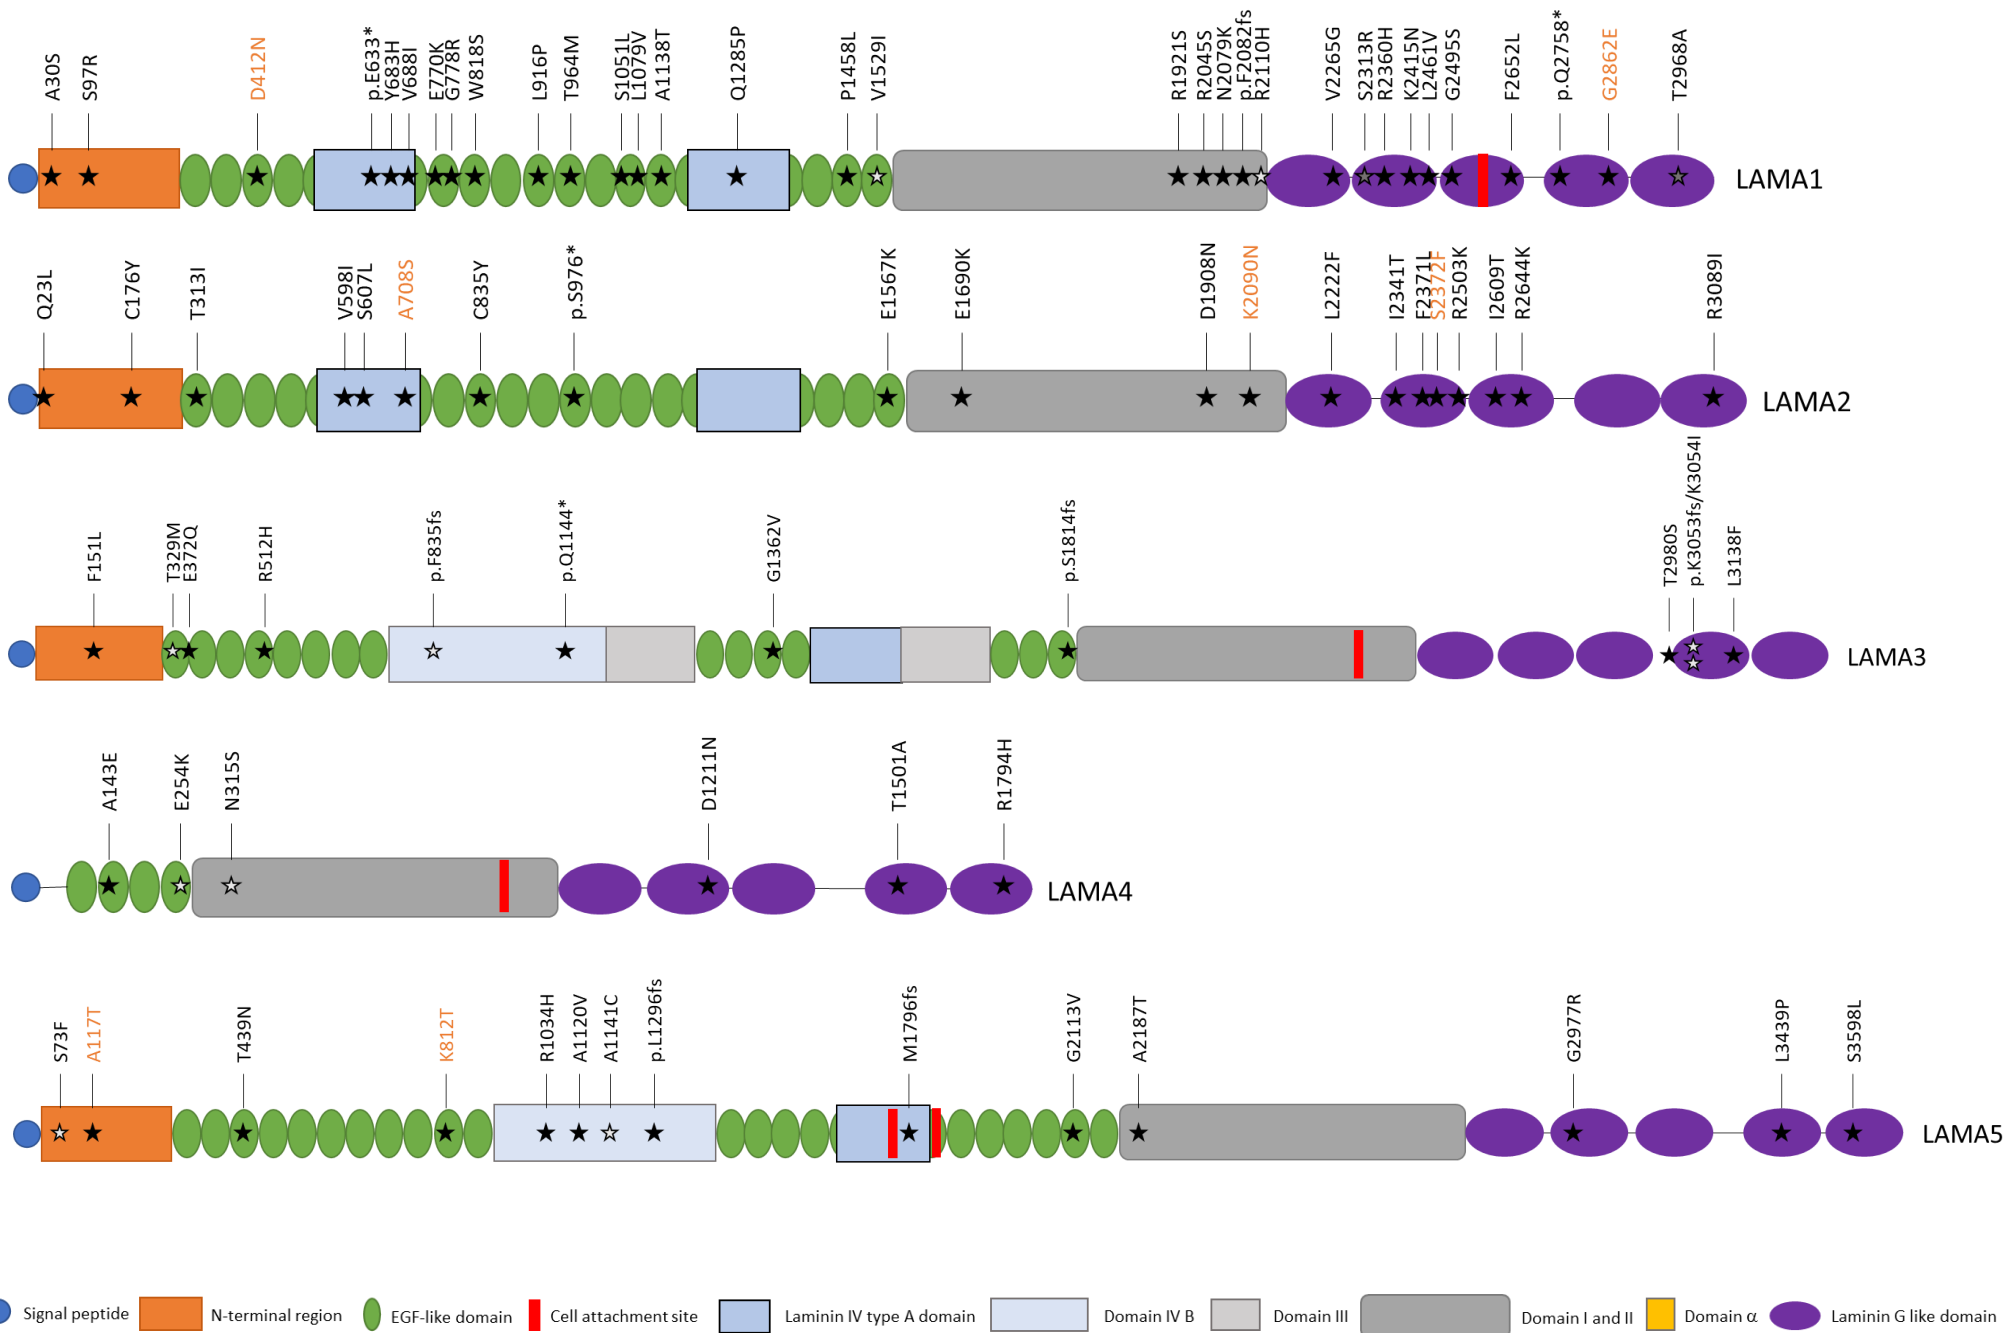



# Laminin $\beta$ subunits

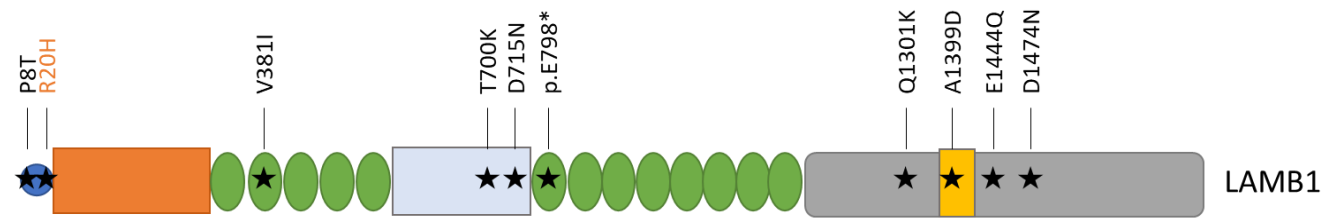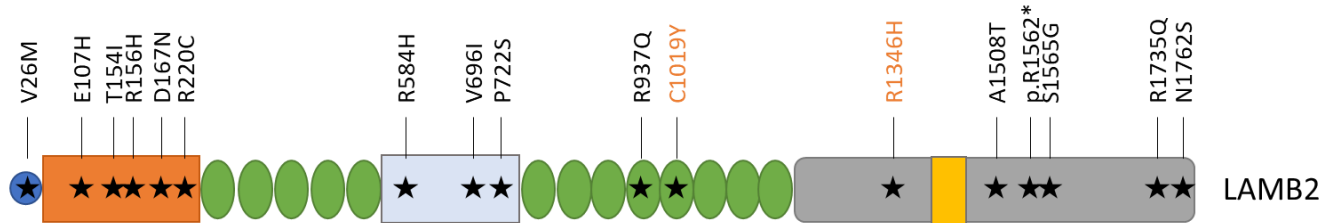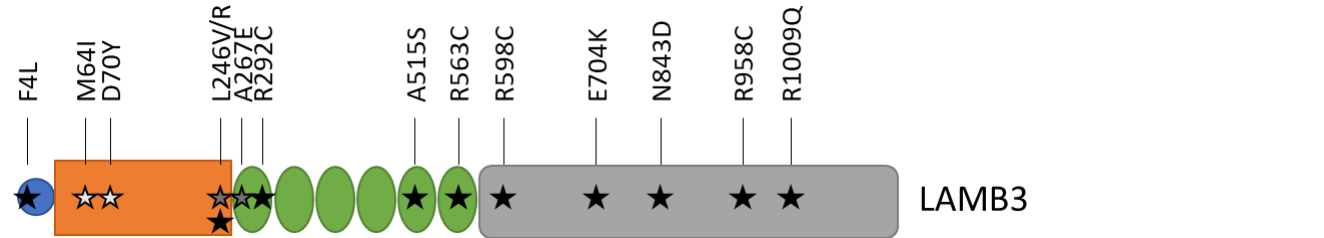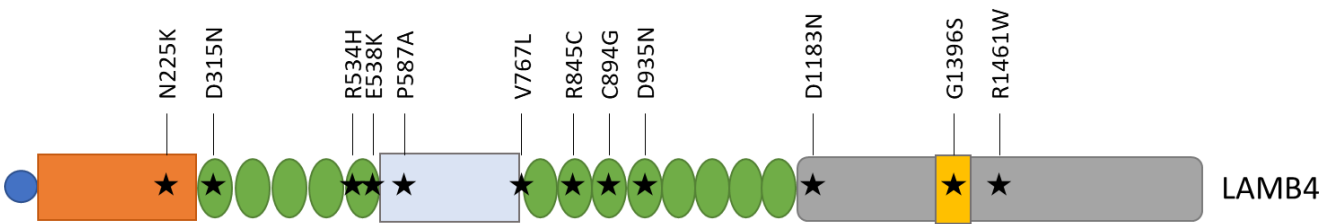

● Signal peptide  
  N-terminal region  
  EGF-like domain  
  Cell attachment site  
  Laminin IV type A domain  
  Domain IV B  
  Domain III  
  Domain I and II  
  Domain  $\alpha$   
  Laminin G like domain

# Laminin $\gamma$ subunits

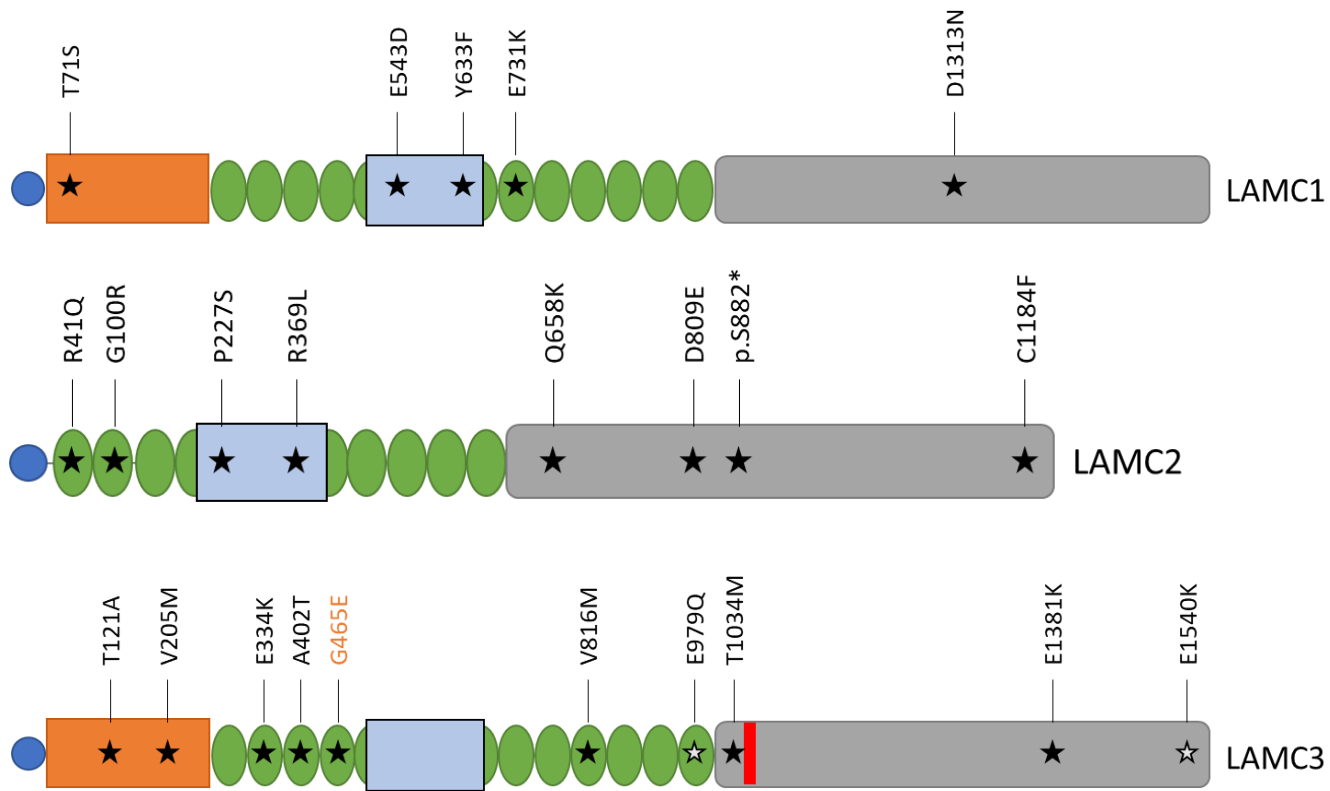

● Signal peptide  
  N-terminal region  
  EGF-like domain  
  Cell attachment site  
  Laminin IV type A domain  
  Domain IV B  
  Domain III  
  Domain I and II  
  Domain  $\alpha$   
  Laminin G like domain

ADAMs

# ADAMs

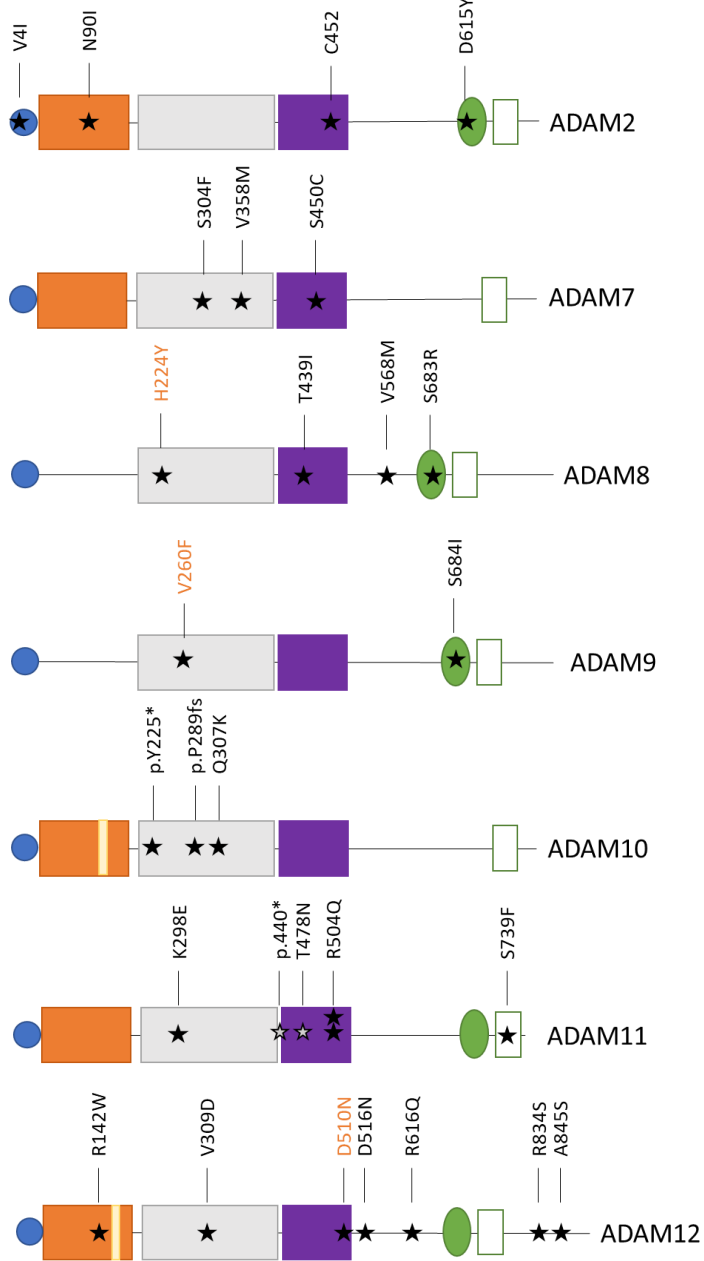

● Signal peptide    ■ Propeptide    ■ Cysteine switch    ■ Peptidase    ■ Disintegrin    ● EGF-like domain    □ Helical transmembrane domain    ■ Cell attachment site    ● Crambin-like domain

# ADAMs

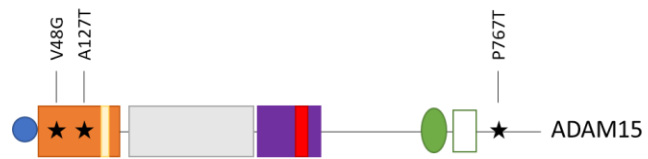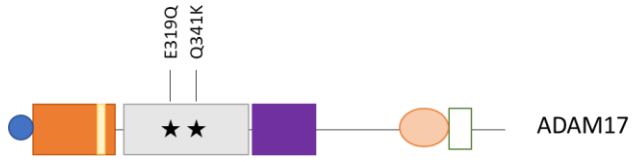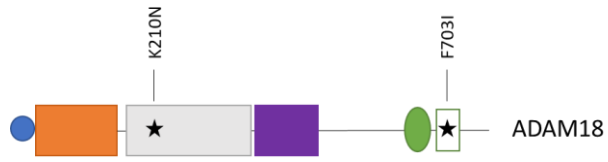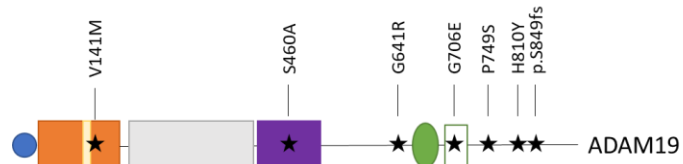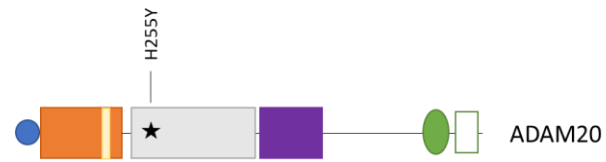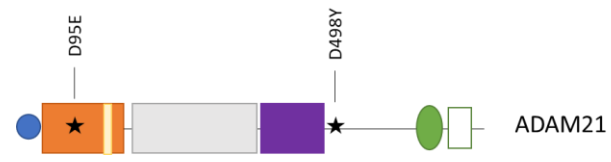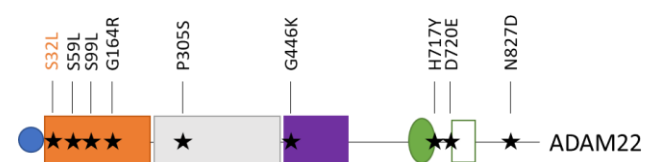

● Signal peptide  
 ■ Propeptide  
 ▬ Cysteine switch  
 ■ Peptidase  
 ■ Disintegrin  
 ● EGF-like domain  
  Helical transmembrane domain  
 ■ Cell attachment site  
 ● Crambin-like domain

# ADAMs

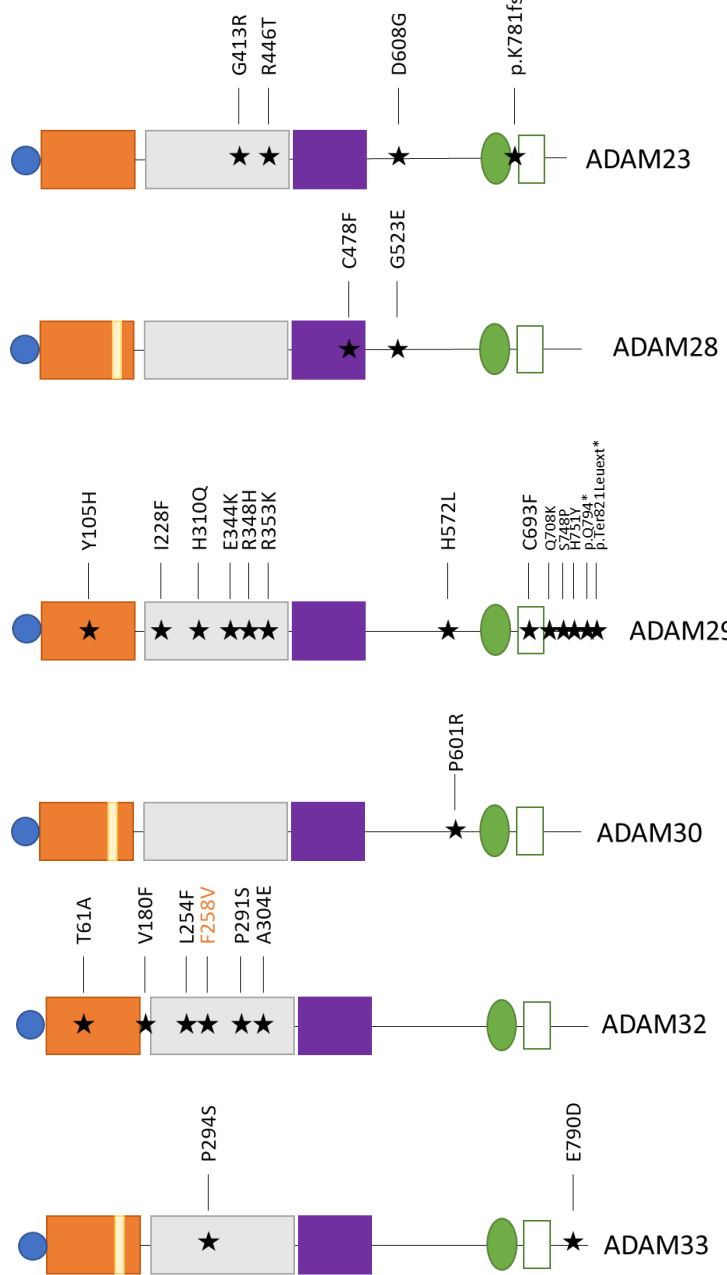

● Signal peptide  
 ■ Propeptide  
 ▬ Cysteine switch  
 ■ Peptidase  
 ■ Disintegrin  
 ● EGF-like domain  
  Helical transmembrane domain  
■ Cell attachment site  
● Crambin-like domain

ADAMTS

# ADAMTS

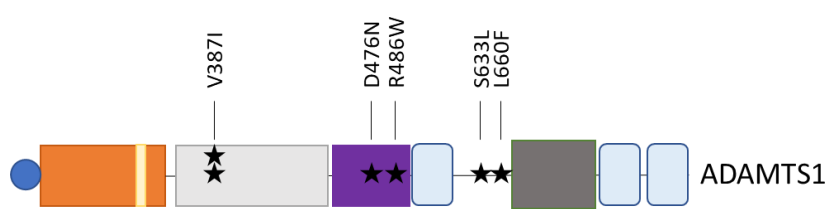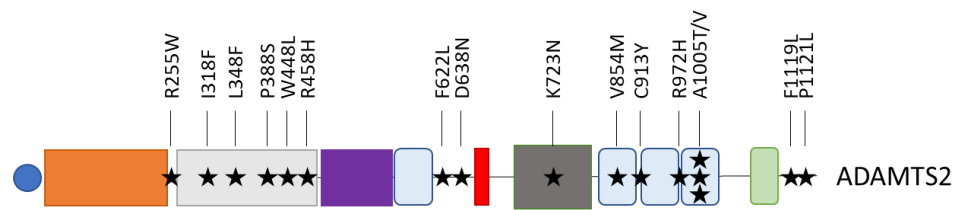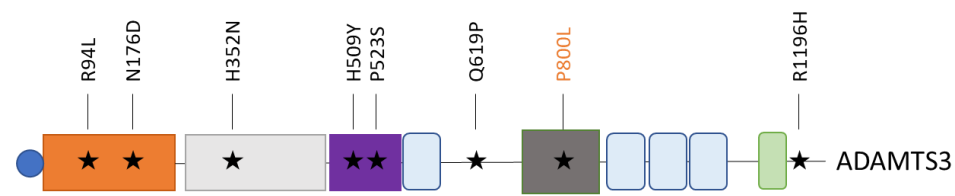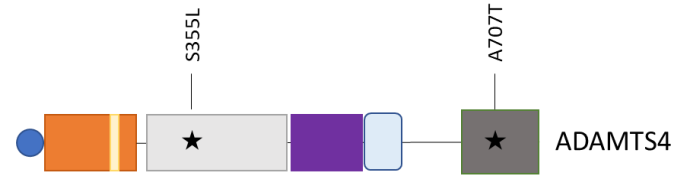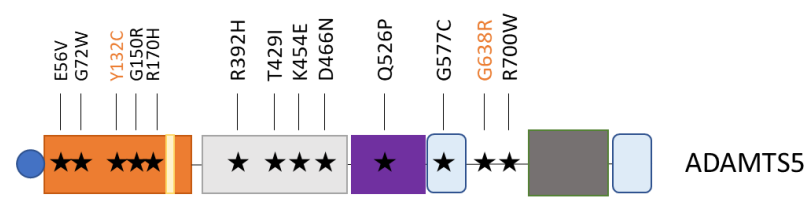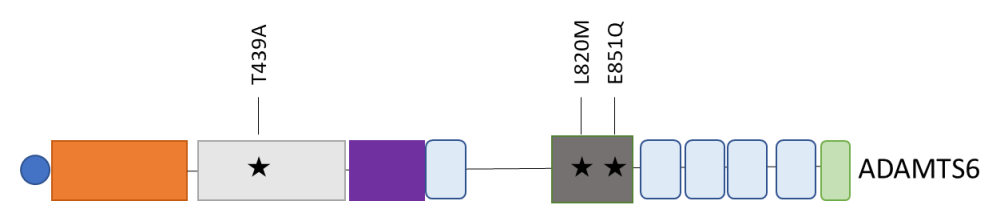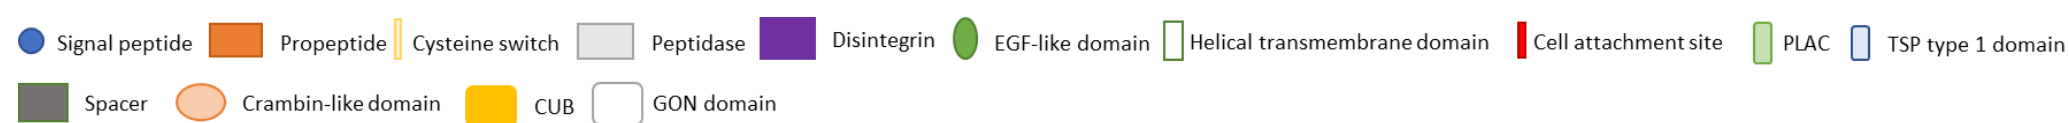



# ADAMTS

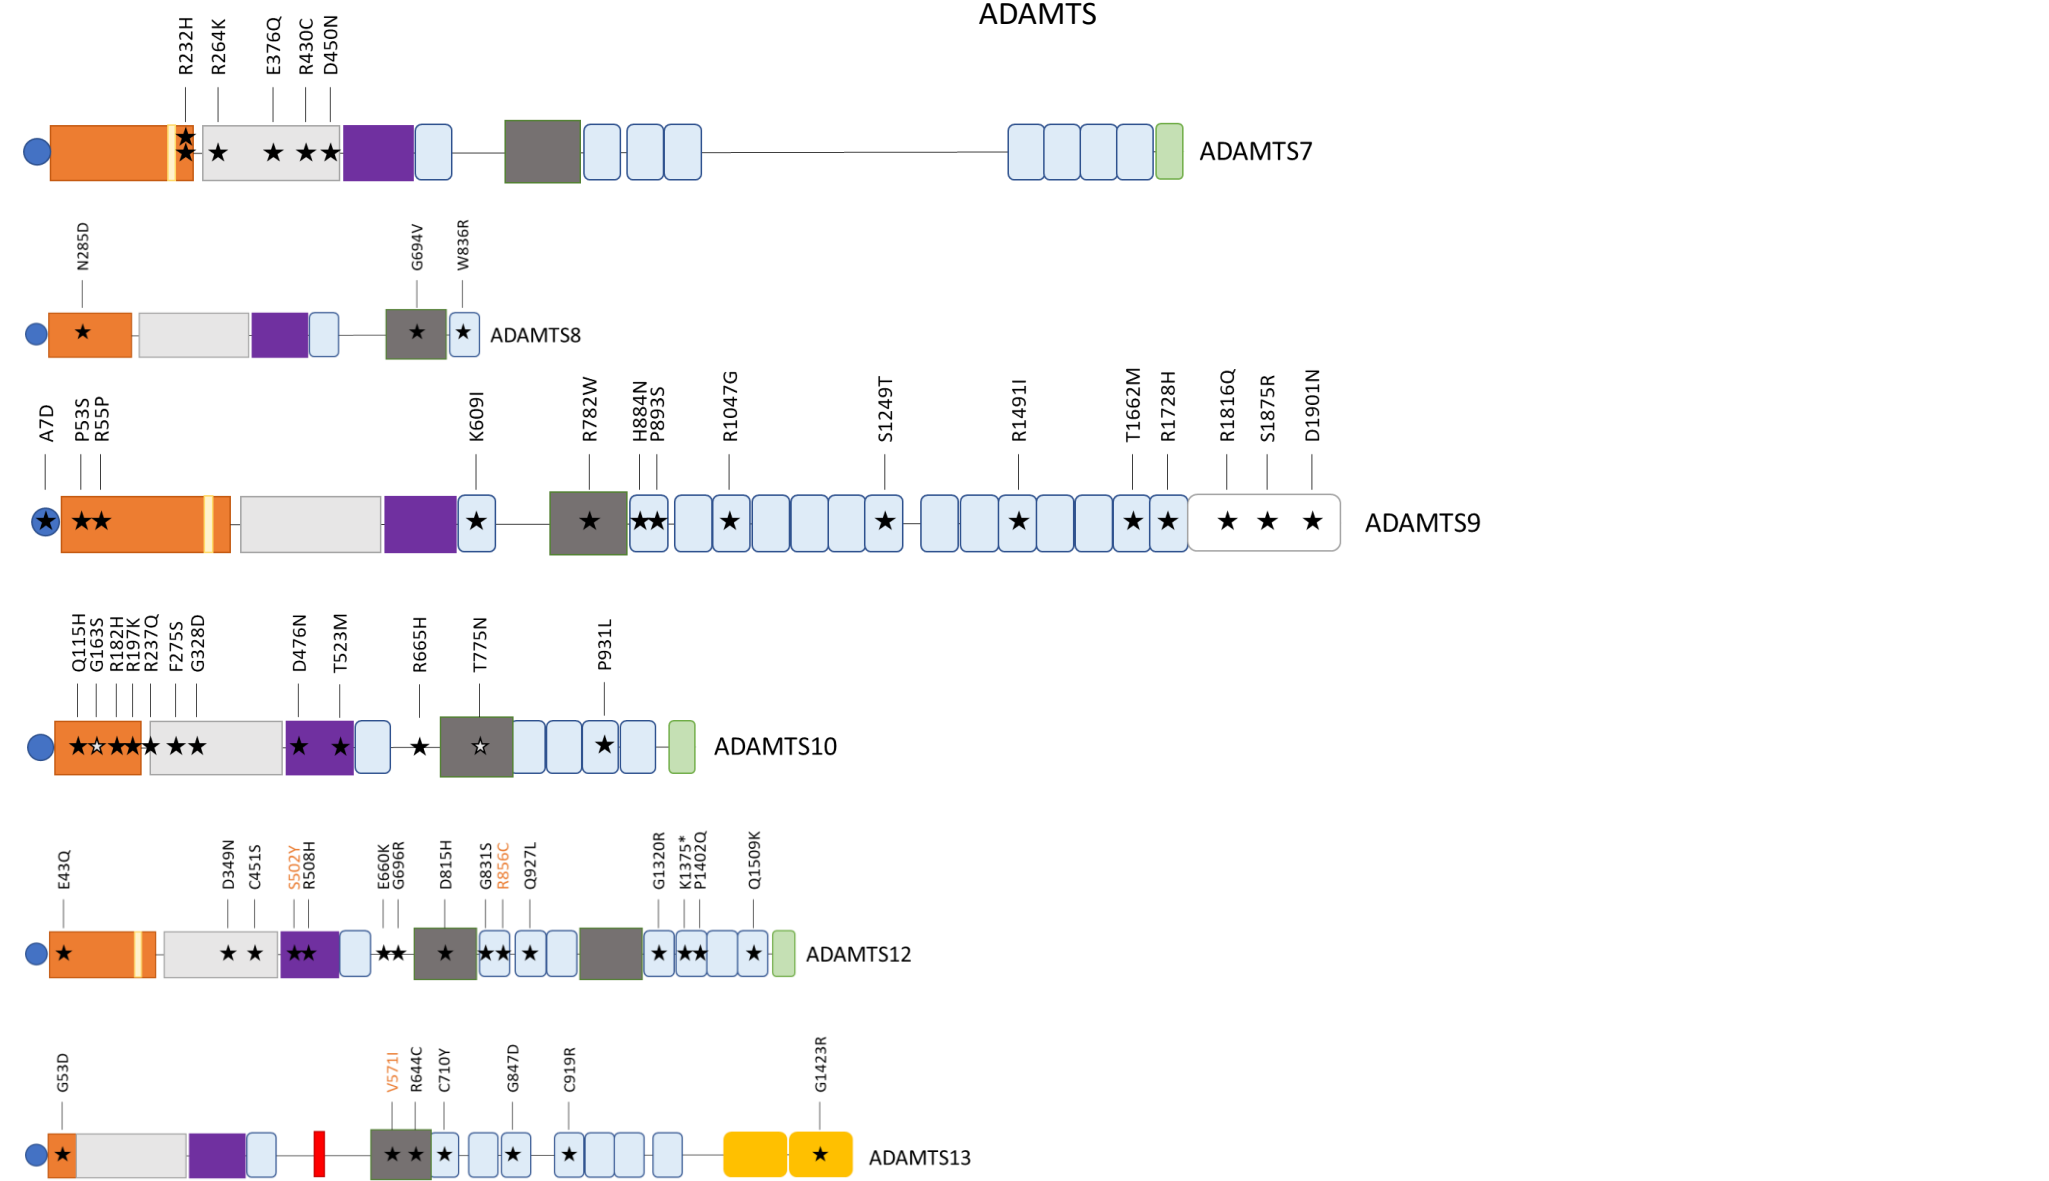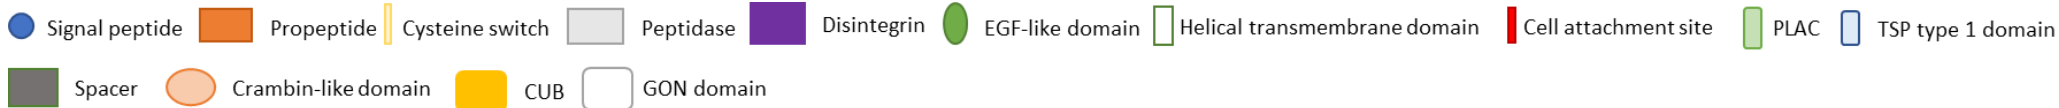

# ADAMTS

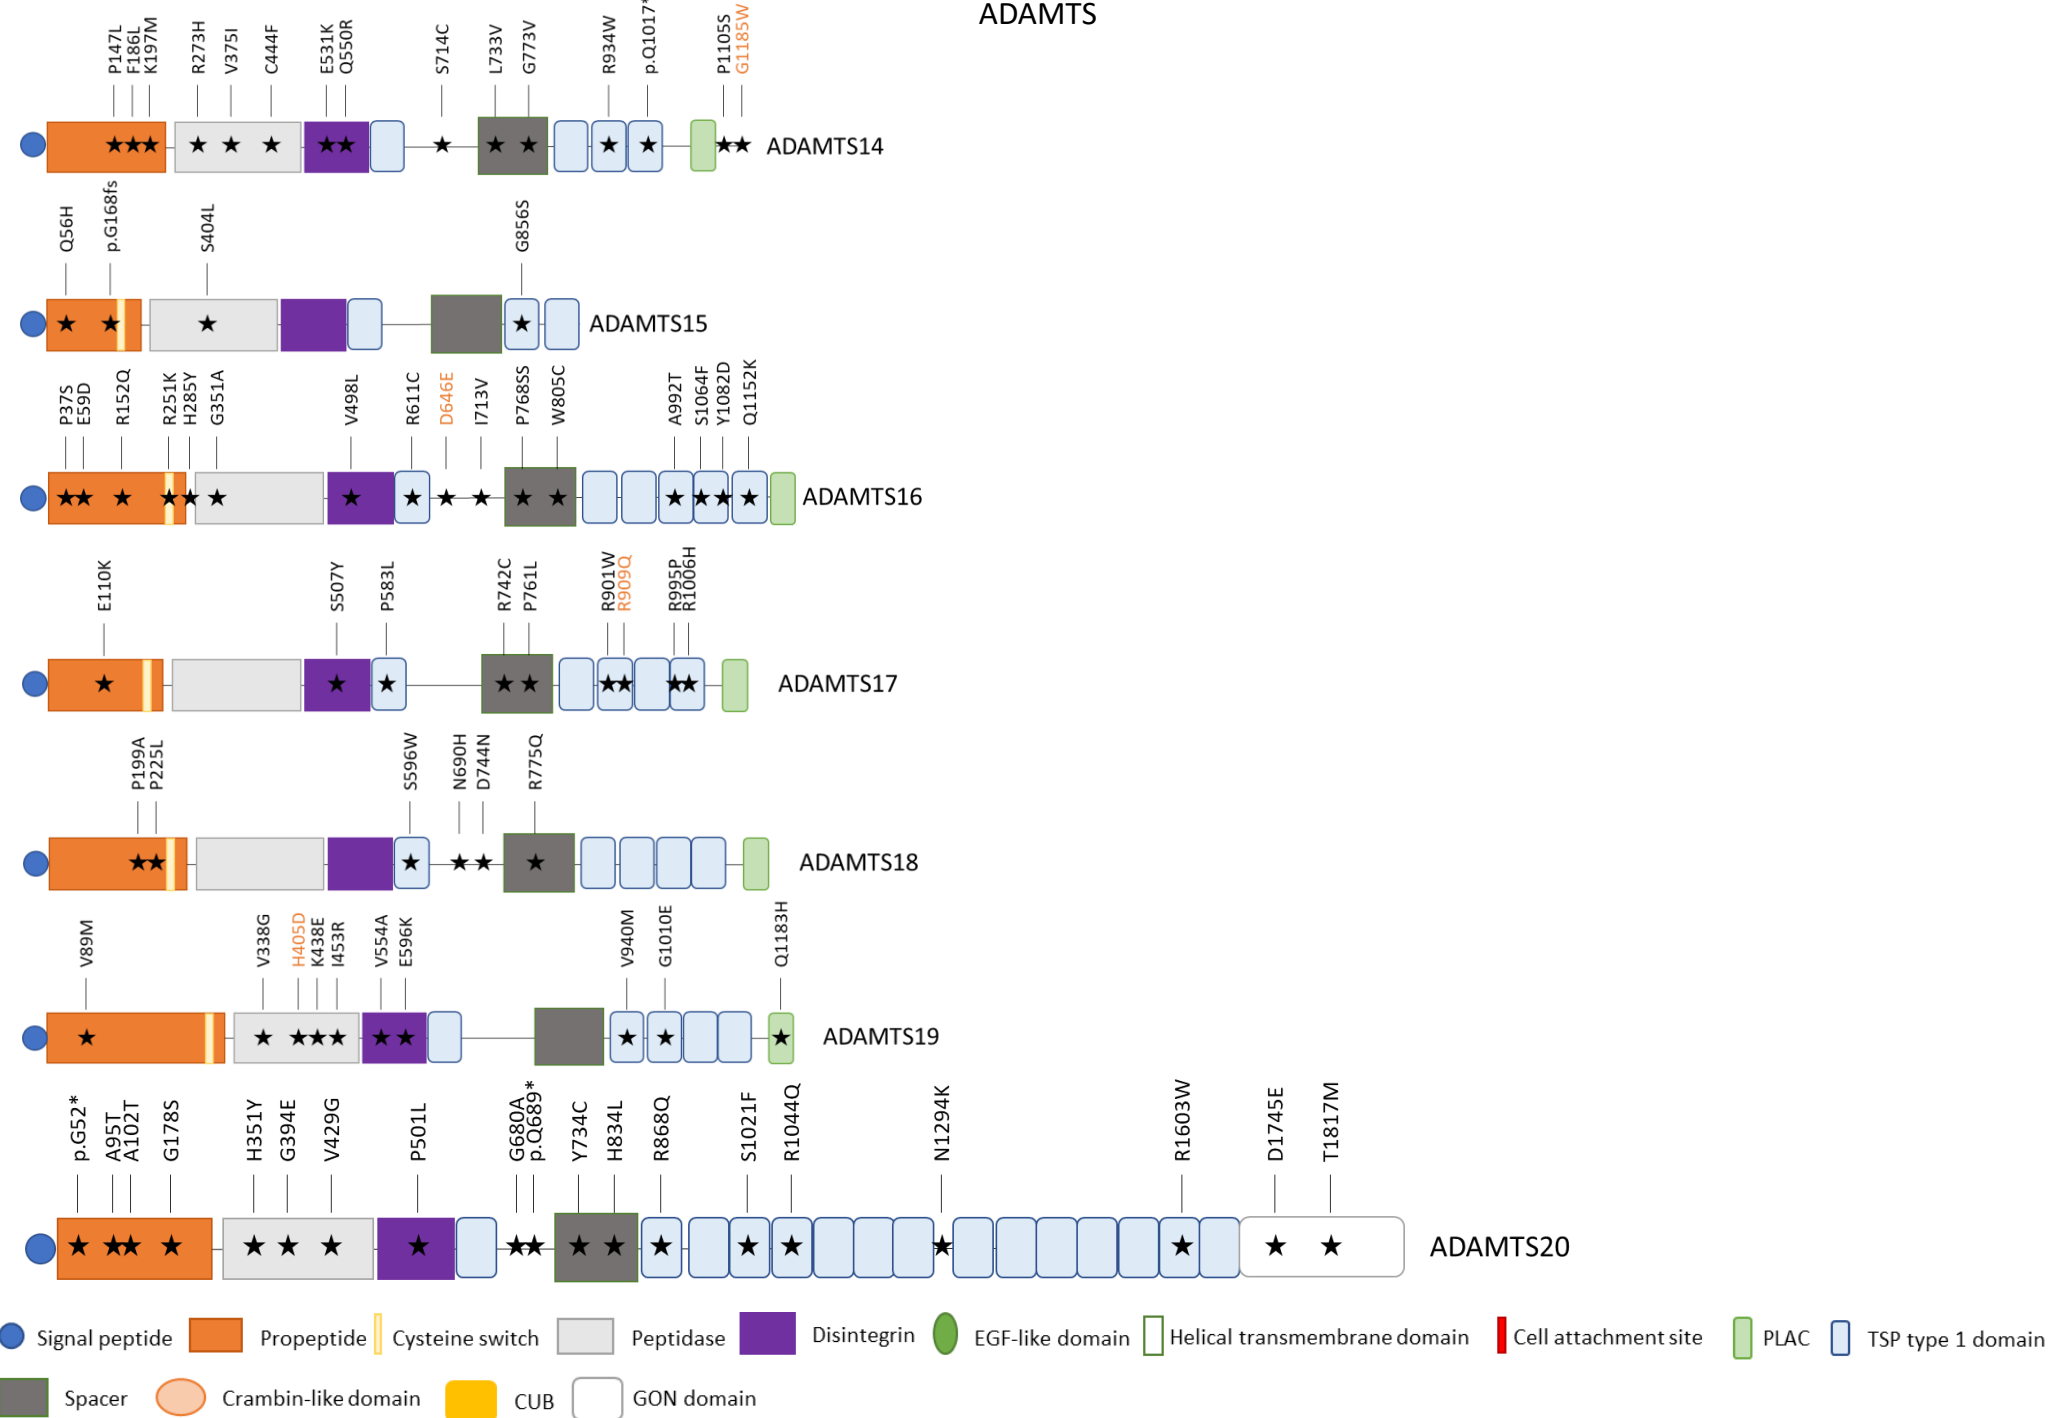

**Figure S2:** Kaplan Meier plots for the comparison of overall and progression-free survival of MMRF patients with a gene expression (GE) higher or lower than the mean/median expression measured across all samples. Statistical correlations were performed using the Log Rank test. *P* values were adjusted for multiple hypothesis testing using Benjamini-Hochberg correction in R. n=800. Graphs were created using GraphPad Prism 9.

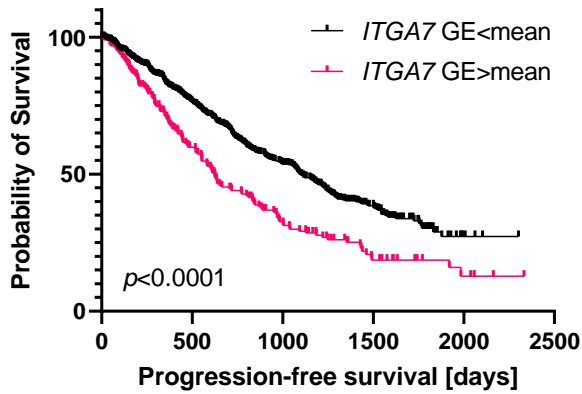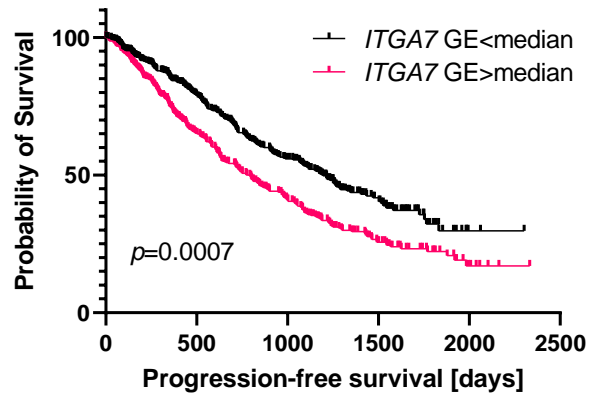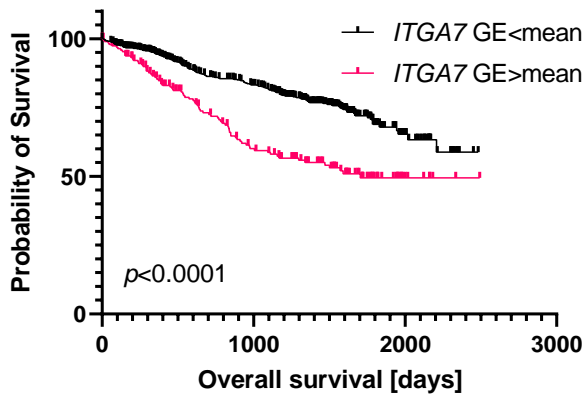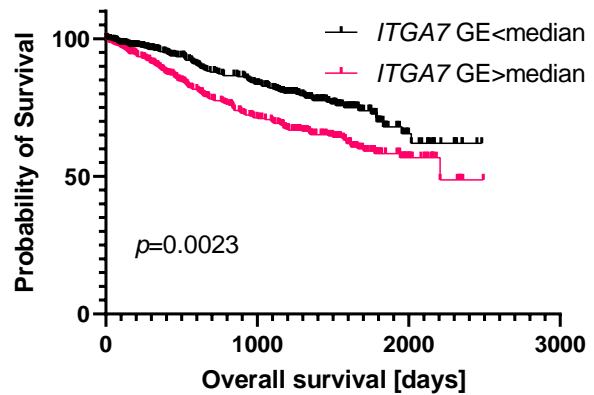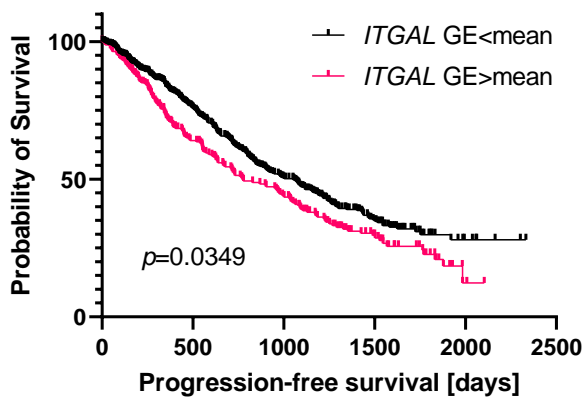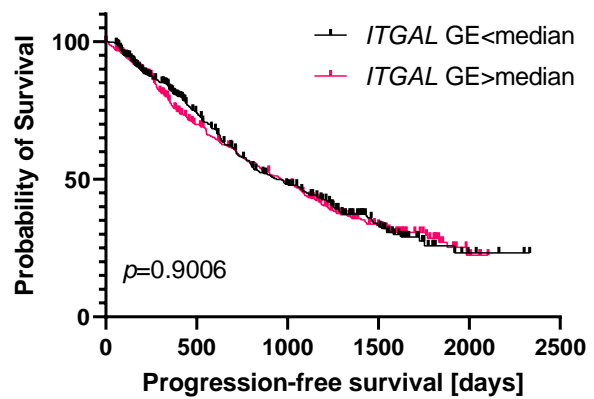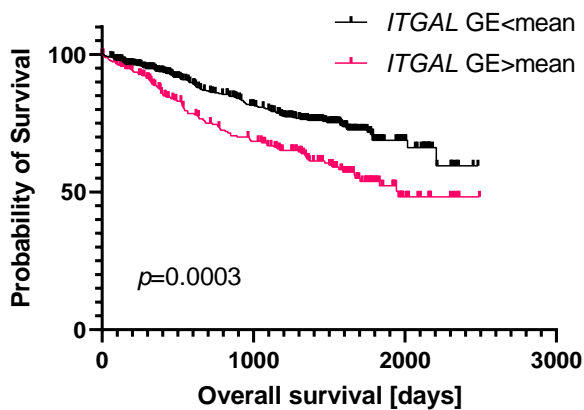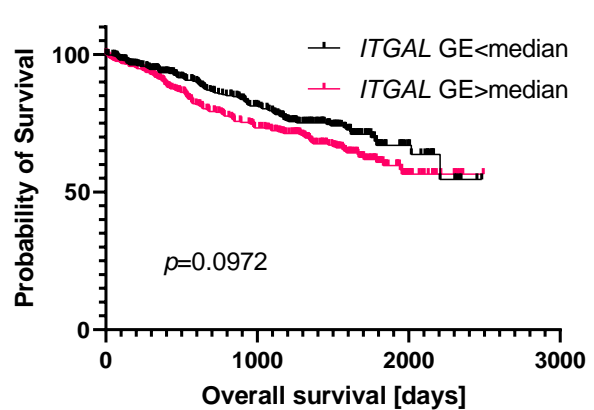

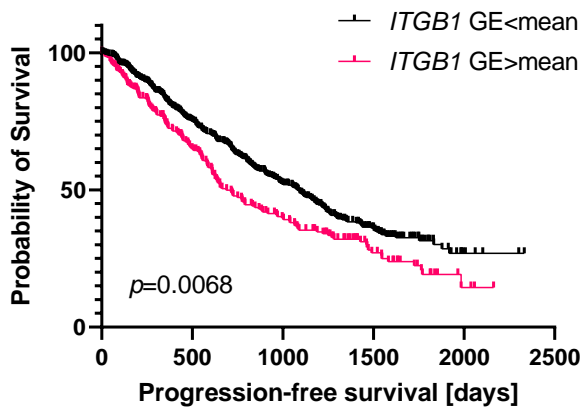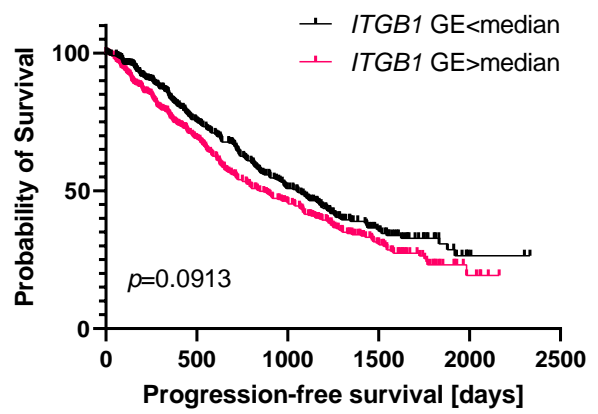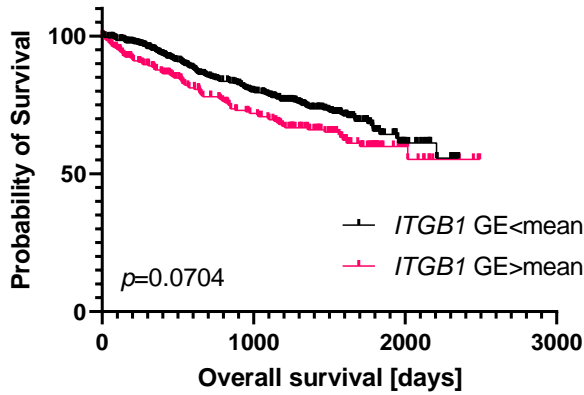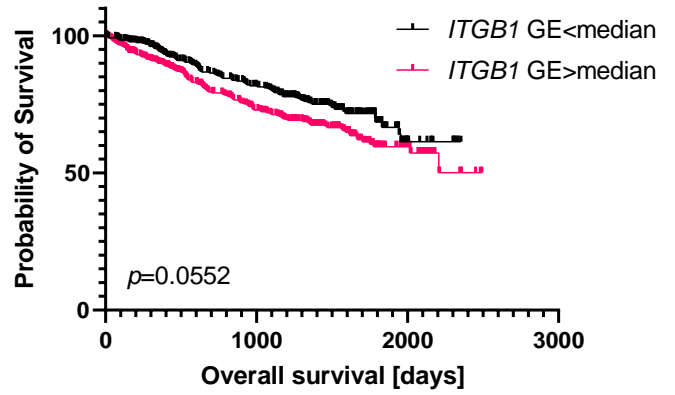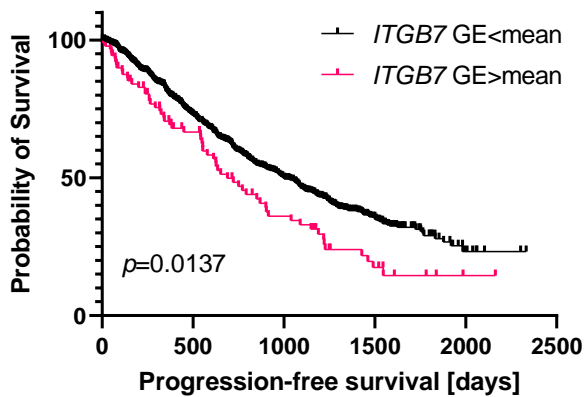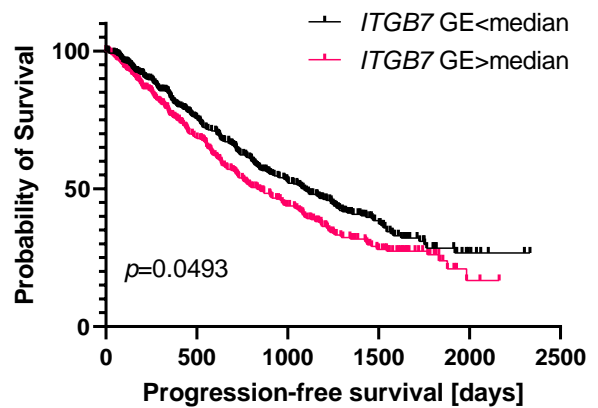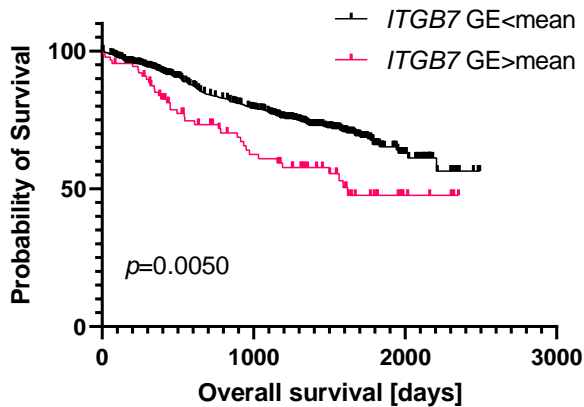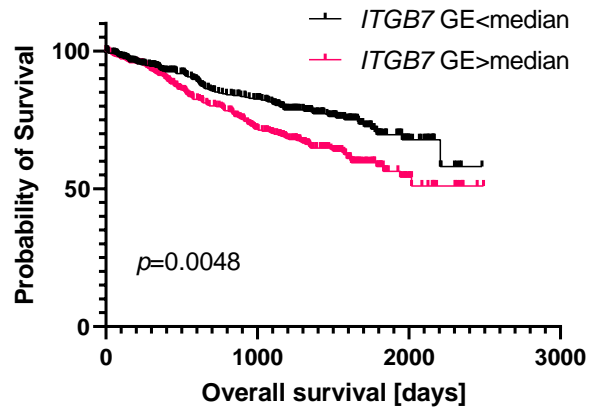

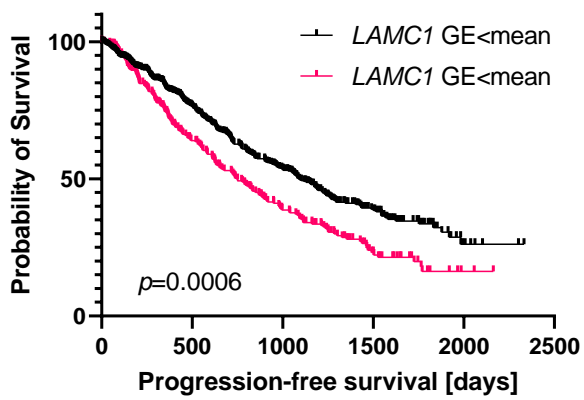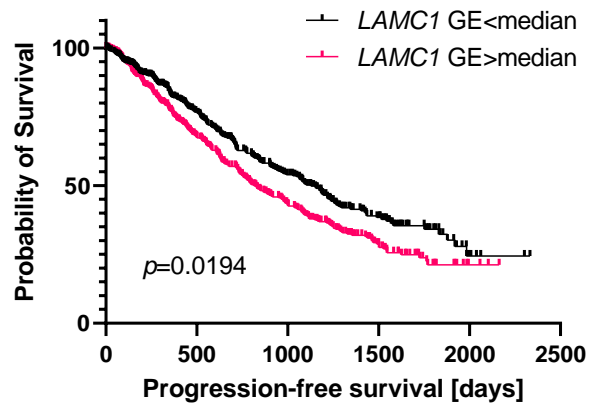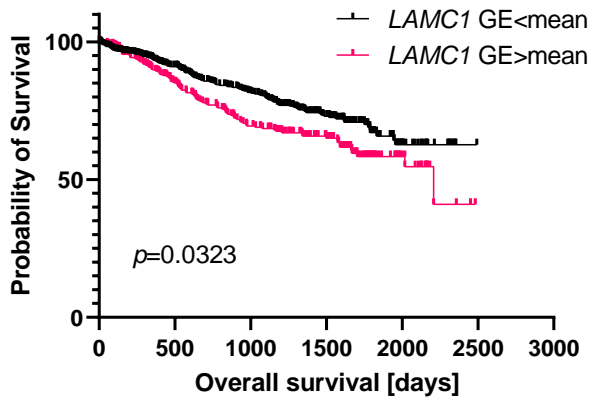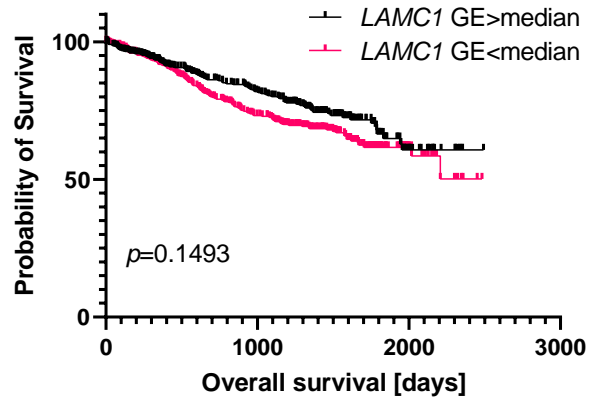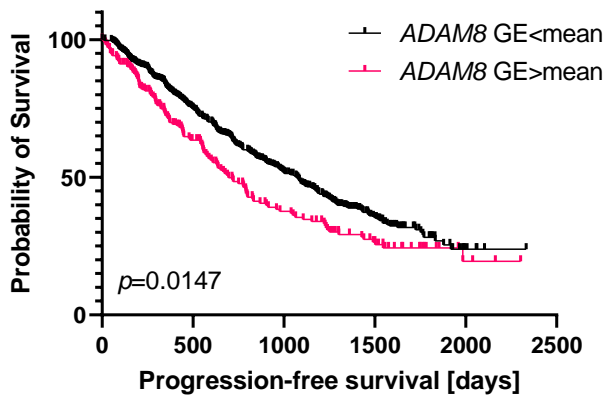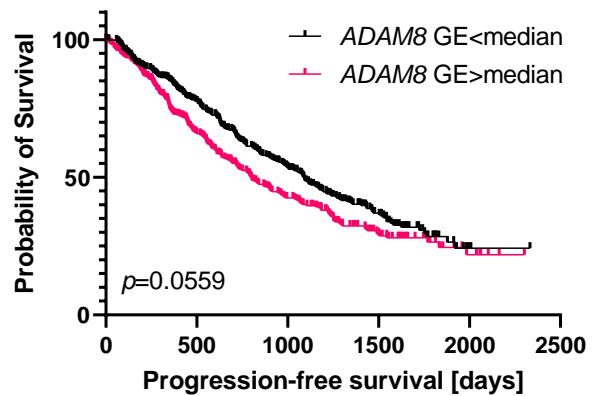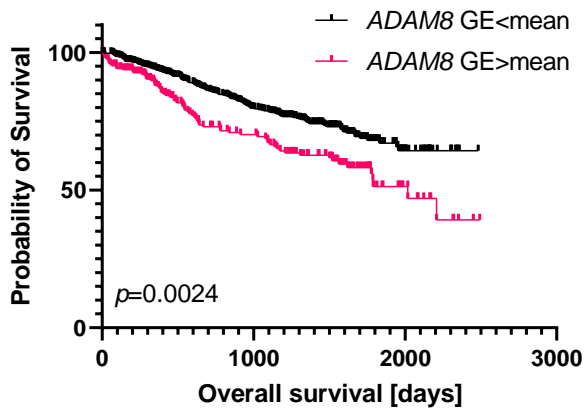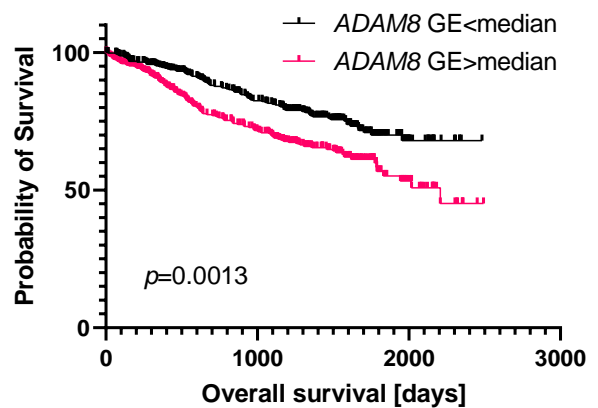

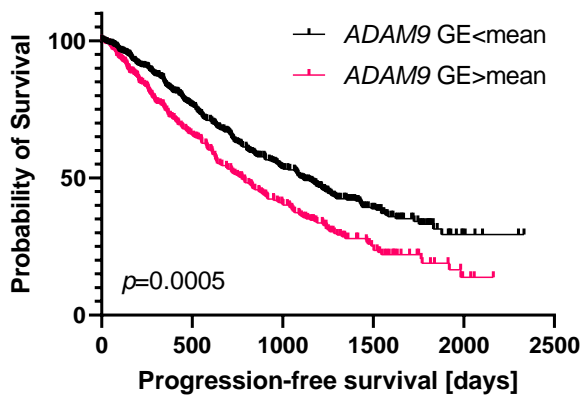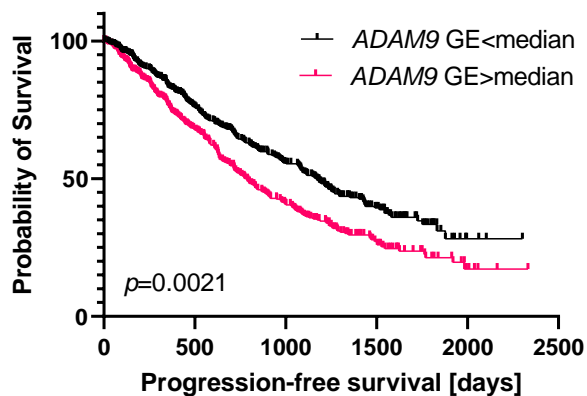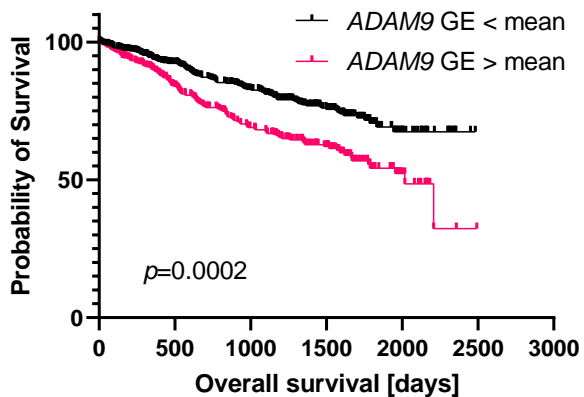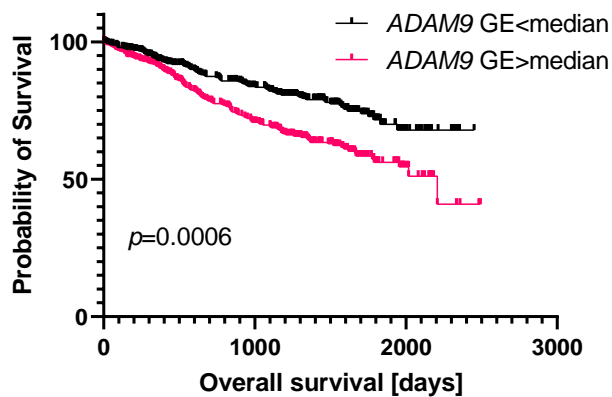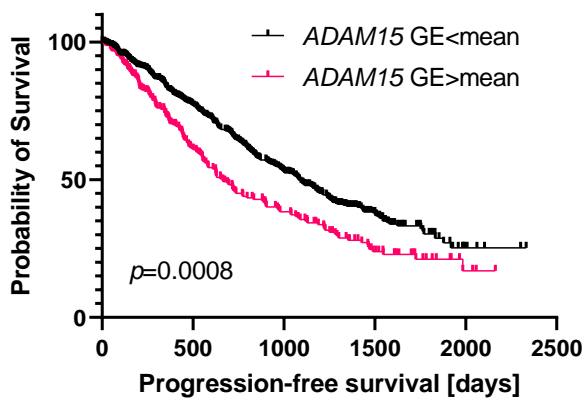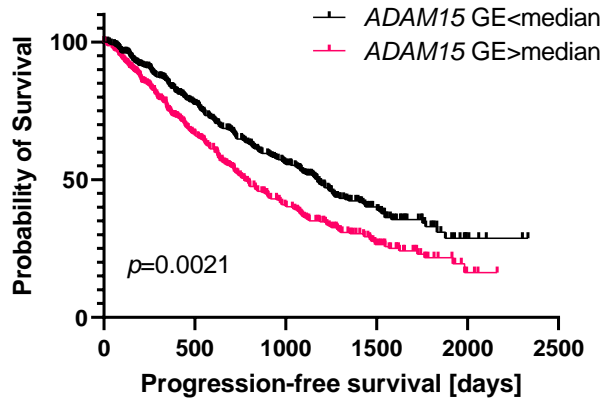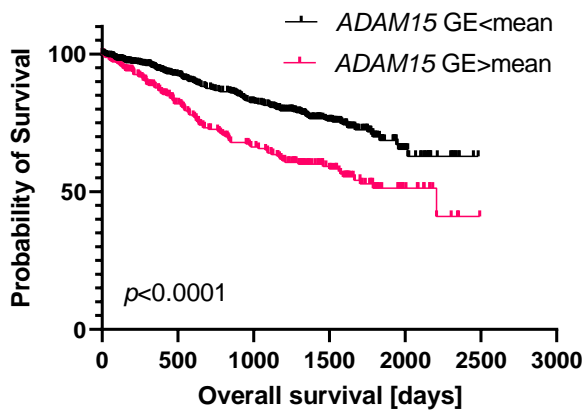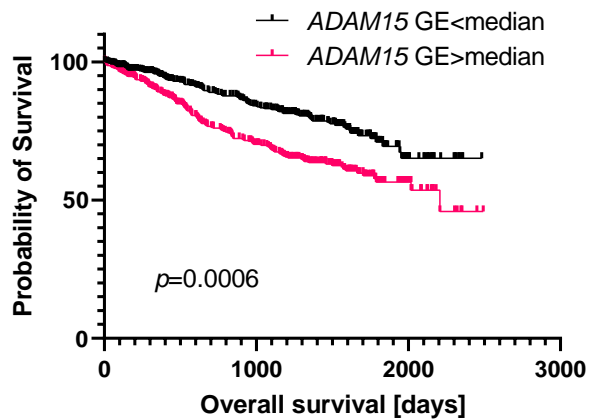

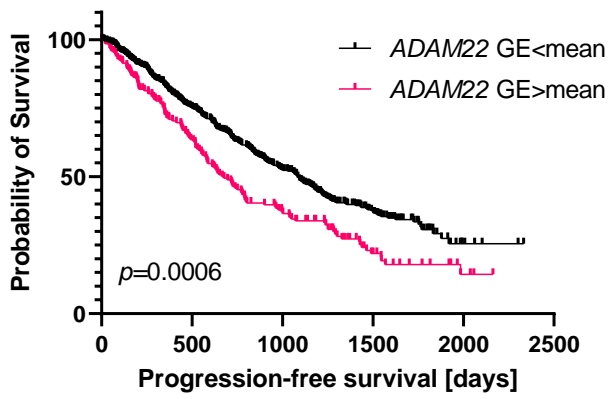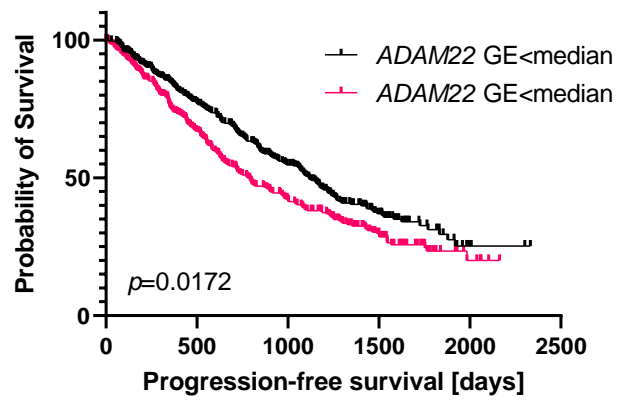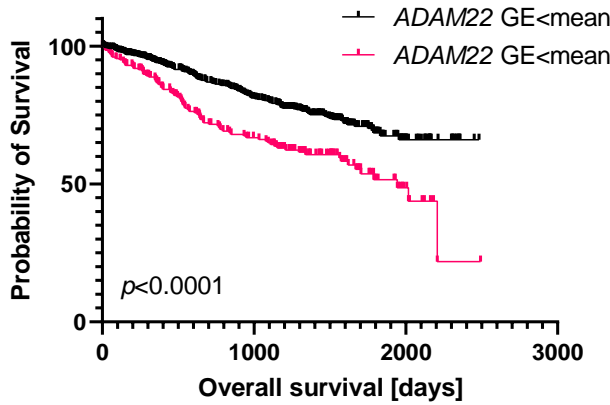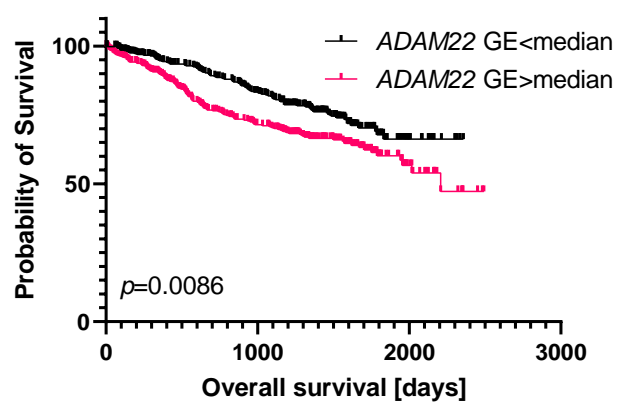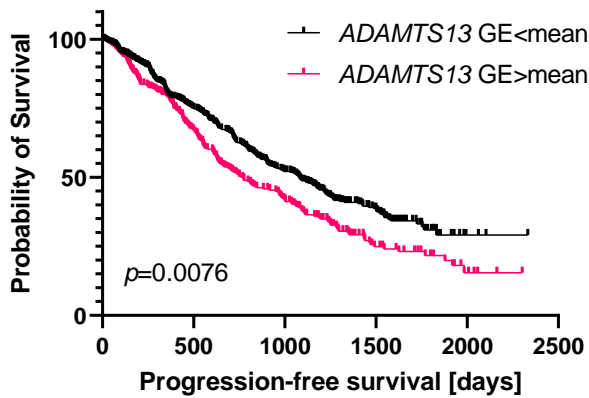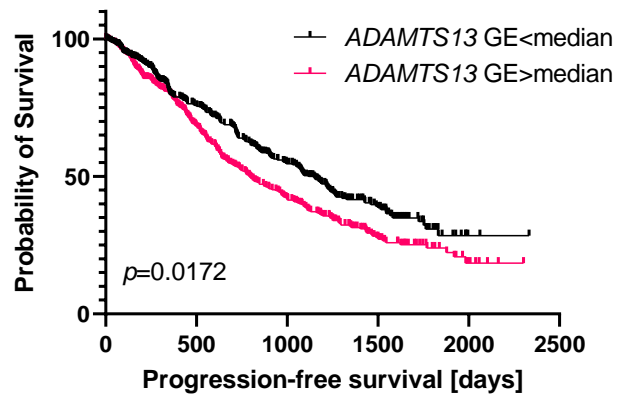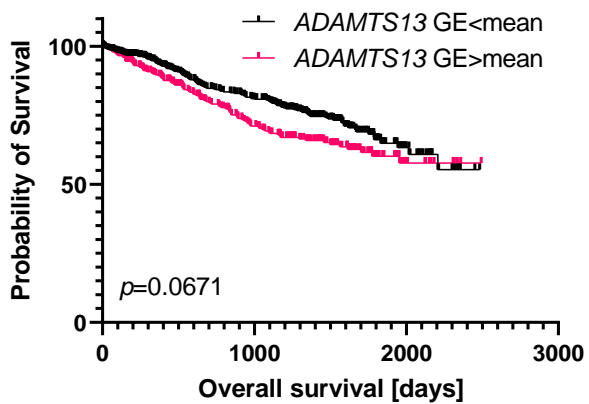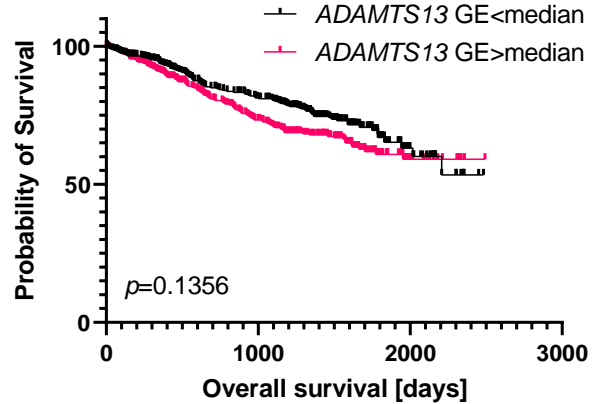

Supplement: 41408_2023_817_MOESM1_ESM.pdf [file 41408_2023_817_MOESM1_ESM.pdf]
